# Supplementary material
Source: PubMed Central journal article supplement (PMC3675946)
Supplement: AEM.00463-13_zam999104420so1.pdf [file AEM.00463-13_zam999104420so1.pdf]

## Supplementary information File 1 (SI File 1)

**Title:** Physiological and transcriptional response to *d*-limonene in *Saccharomyces cerevisiae*

shows changes to the cell wall, not the plasma membrane

**Authors:** Timothy C. R. Brennan<sup>1</sup>, Jens O. Krömer<sup>2#</sup>, Lars K. Nielsen<sup>1</sup>

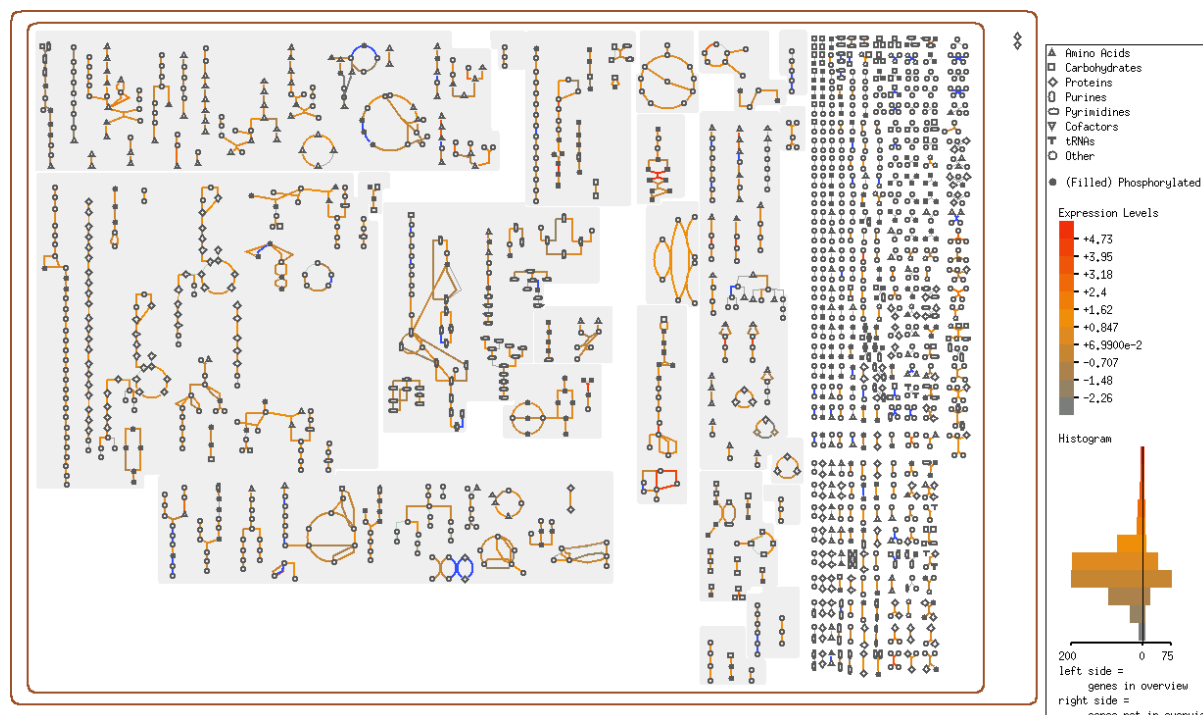

**SI Fig 1.** Metabolic map of entire transcriptome dataset.

Total number of data rows (not including comment lines): 10563

Number of rows for which the gene could not be found: 9804

Number of rows for which the gene name was ambiguous: 0

Number of rows for which the gene is valid, but for which a data value was missing or malformed: 0

The table below shows statistics for the selected column/column ratio for all genes and for those genes that appear in the Overview (or in any of the selected overviews, if multiple were selected).

| Data Statistics   | All Genes | Overview Genes |
|-------------------|-----------|----------------|
| Number of values: | 759       | 619            |
| Minimum value:    | -3.037    | -3.037         |

Maximum value: 5.5071 5.5071  
 Median: -0.0144 0.032449998  
 Mean: -0.0021671697 0.019628845  
 Standard deviation: 0.9757149 1.027266

**SI Table 1.** Metabolic pathway analysis of exposure to limonene. Values are log<sub>2</sub> treatment/control ratio and only pathways exceeding threshold value of ±2 are shown.

| Pathway                               | Pathway Diagram                                                                                                                                                                                                                                                                                                                                                                                                                                                                               | Enzymes, Genes, and Enzyme Cellular Locations                                                                                                                                                                                                                                                                                                                                                                                                                                                                                                                                                                                                            |
|---------------------------------------|-----------------------------------------------------------------------------------------------------------------------------------------------------------------------------------------------------------------------------------------------------------------------------------------------------------------------------------------------------------------------------------------------------------------------------------------------------------------------------------------------|----------------------------------------------------------------------------------------------------------------------------------------------------------------------------------------------------------------------------------------------------------------------------------------------------------------------------------------------------------------------------------------------------------------------------------------------------------------------------------------------------------------------------------------------------------------------------------------------------------------------------------------------------------|
| <a href="#">lysine biosynthesis</a>   | <p>2-oxoglutarate<br/>     LYS21 -1.65 LYS20 -2.01<br/>   homocitrate<br/>     LYS4 -2.22<br/>   Homoaconitate<br/>     LYS4 -2.22<br/>   homo-isocitrate<br/>     LYS12 -1.92<br/>   alpha-ketoadipate<br/>    <br/>   L-2-Amino adipate<br/>     LYS2 -2.02<br/>   L-2-Amino adipate 6-semialdehyde<br/>     LYS9 -2.58<br/>   saccharopine<br/>     LYS1 -2.21<br/>   L-lysine</p>                                                                                                         | <p><a href="#">homocitrate synthase</a> <a href="#">LYS2</a><br/>0</p> <p><a href="#">homocitrate synthase</a> <a href="#">LYS2</a><br/>1</p> <p><a href="#">homoaconitase</a> <a href="#">LYS4</a></p> <p><a href="#">homo-isocitrate dehydrogenase</a> <a href="#">LYS1</a><br/>2</p> <p><a href="#">alpha amino adipate reductase</a> <a href="#">LYS2</a></p> <p><a href="#">saccharopine dehydrogenase (NADP+, L-glutamate-forming)</a> <a href="#">LYS9</a></p> <p><a href="#">saccharopine dehydrogenase (NAD+, L-lysine-forming)</a> <a href="#">LYS1</a></p>                                                                                    |
| <a href="#">arginine biosynthesis</a> | <p>N-acetylglutamyl-phosphate<br/>     ARG5,6<br/>   N-acetyl-L-glutamate N-acetylglutamate semialdehyde<br/>     ARG8 -1.5<br/>   L-ornithine<br/>     ARG7 -1.23<br/>   N-alpha-acetylornithine<br/>    <br/>   citrulline<br/>     ARG3 -3.02<br/>   L-argininosuccinate<br/>     ARG1 -2.17<br/>     ARG4 -0.805<br/>   L-arginine</p> <p>L-glutamate<br/>     ARG7 -1.23 ARG2 -0.121<br/>   N-acetyl-L-glutamate<br/>     CPA1 -0.846 CPA2 -1.31<br/>   carbanoyl-phosphate<br/>    </p> | <p><a href="#">ornithine carbamoyltransferase</a> <a href="#">ARG3</a></p> <p><a href="#">acetylornithine aminotransferase</a> <a href="#">ARG8</a></p> <p><a href="#">acetylglutamate kinase / N-acetyl-gamma-glutamyl-phosphate reductase</a> <a href="#">ARG5,6</a></p> <p><a href="#">carbamoyl phosphate synthetase</a> <a href="#">CPA1 CPA2</a></p> <p><a href="#">acetylglutamate synthase</a> <a href="#">ARG2</a></p> <p><a href="#">acetylornithine acetyltransferase</a> <a href="#">ARG7</a></p> <p><a href="#">arginosuccinate synthetase</a> <a href="#">ARG1</a></p> <p><a href="#">argininosuccinate lyase</a> <a href="#">ARG4</a></p> |

[glycine cleavage complex](#)

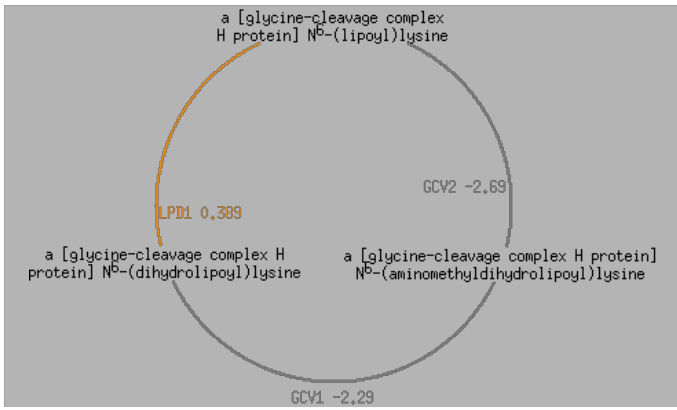

[glycine decarboxylase complex P subunit](#) [GCV2](#)  
[GCV1](#) [GCV1](#)  
[dihydrolipoamide dehydrogenase](#) [LPD1](#)

[folate interconversions](#)

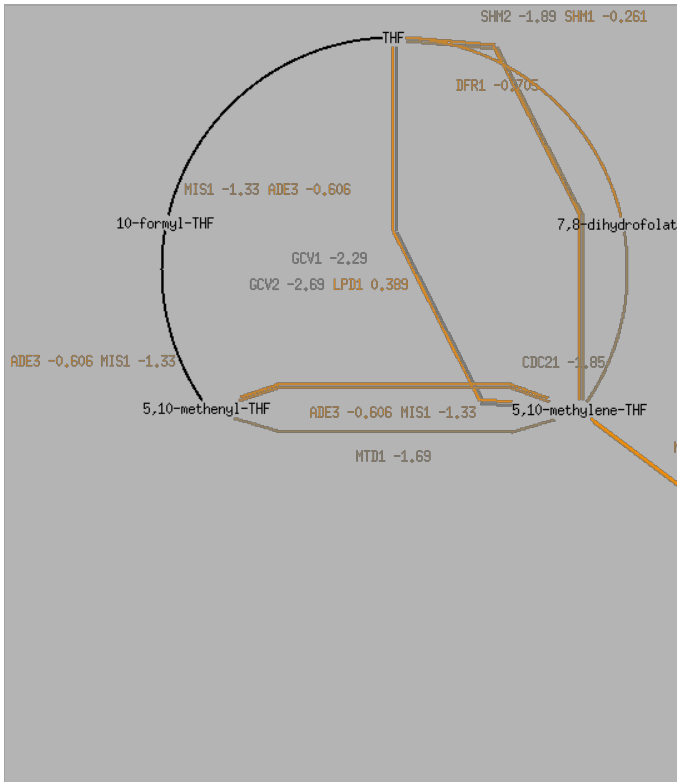

[C1-tetrahydrofolate synthase](#) [ADE3](#)  
[mitochondrial C1-tetrahydrofolate synthase](#) [MIS1](#)  
[Serine hydroxymethyltransferase, mitochondrial](#) [SHM1](#)  
[serine hydroxymethyltransferase](#) [SHM2](#)  
[thymidylate synthase](#) [CDC21](#)  
[dihydrofolate reductase](#) [DFR1](#)  
[glycine cleavage complex](#) [GCV1](#) [GCV2](#) [LPD1](#)  
[MTHFR](#) [MET13](#)  
[MTHFR](#) [MET12](#)  
[NAD-dependent 5,10-methylenetetrahydrofolate dehydrogenase](#) [MTD1](#)

[folate biosynthesis](#)

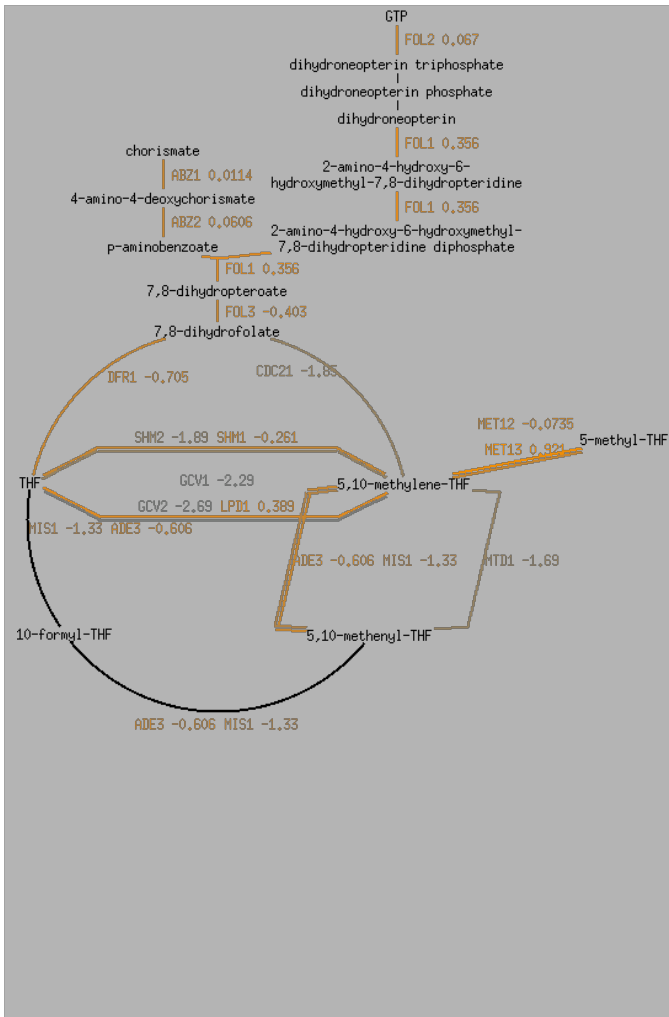

- [aminodeoxychorismat e synthase](#) [ABZ1](#)
- [GTP-cyclohydrolase I](#) [FOL2](#)
- [aminodeoxychorismat e lyase](#) [ABZ2](#)
- [2-amino-4-hydroxy-6- hydroxymethyldihydr opteridine pyrophosphokinase \[multifunctional\]](#) [FOL1](#)
- [dihydrofolate synthase](#) [FOL3](#)
- [dihydrofolate reductase](#) [DFR1](#)
- [glycine cleavage complex](#) [GCV1](#) [GCV2](#) [LPD1](#)
- [Serine hydroxymethyltransf erase, mitochondrial](#) [SHM1](#)
- [serine hydroxymethyltransf erase](#) [SHM2](#)
- [thymidylate synthase](#) [CDC21](#)
- [MTHFR](#) [MET13](#)
- [MTHFR](#) [MET12](#)
- [NAD-dependent 5,10- methylenetetrahydrofa late dehydrogenase](#) [MTD1](#)
- [C1-tetrahydrofolate synthase](#) [ADE3](#)
- [mitochondrial C1- tetrahydrofolate synthase](#) [MIS1](#)

[de novo biosynthesis of purine nucleotides](#)

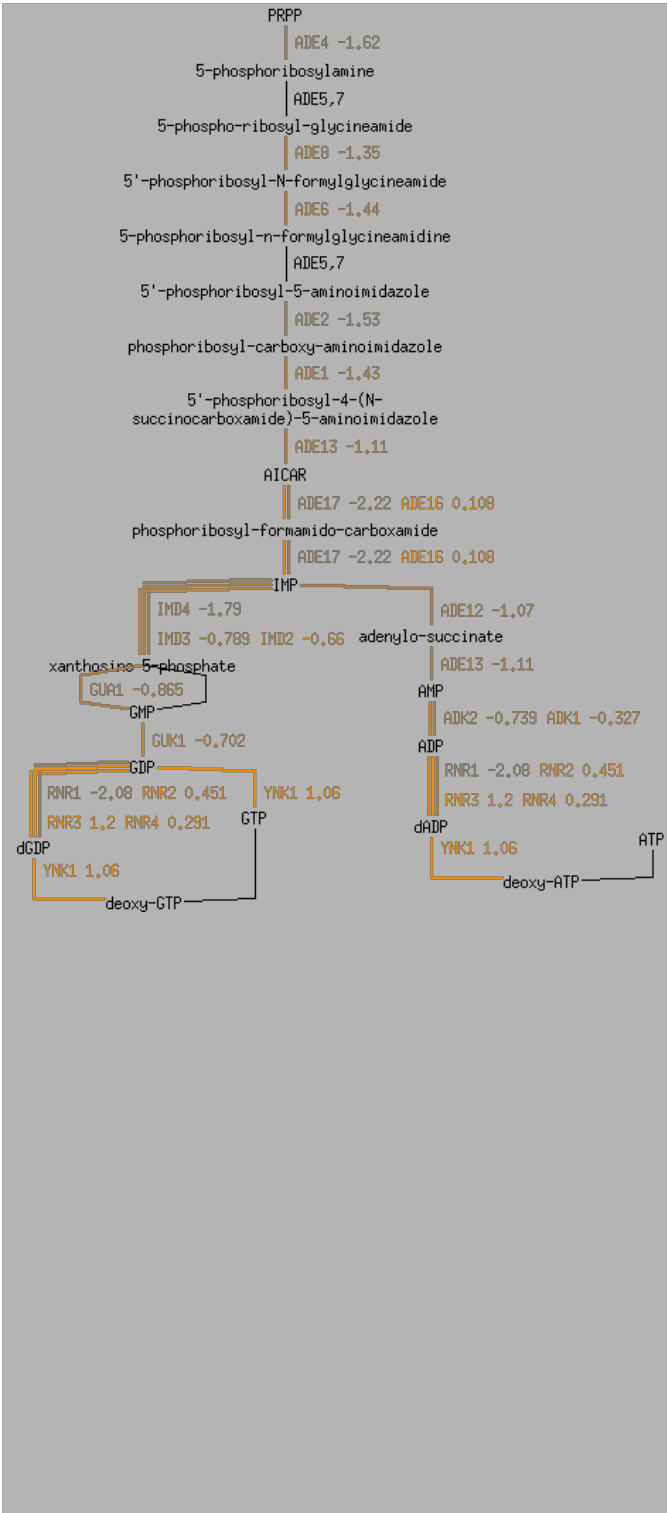

- [phosphoribosylpyrophosphate amidotransferase](#) [ADE4](#)
- [glycinamide ribotide transformylase](#) [ADE8](#)
- [5'-phosphoribosylformylglycinamide synthetase](#) [ADE6](#)
- [phosphoribosylglycinamide synthetase / phosphoribosylaminoimidazole synthetase](#) [ADE5,7](#)
- [phosphoribosylaminoimidazole-carboxylase](#) [ADE1](#)
- [phosphoribosylaminoimidazole succinocarboxamide synthetase](#) [ADE13](#)
- [phosphoribosylformylamido-carboxylase](#) [ADE17 ADE16](#)
- [phosphoribosylaminoimidazole succinocarboxamide synthetase](#) [ADE12 ADE13](#)
- [inosine monophosphate cyclohydrolase \[multifunctional\]](#) [ADE16](#)
- [inosine monophosphate cyclohydrolase \[multifunctional\]](#) [ADE17](#)
- [IMP dehydrogenase](#) [IMD2](#)
- [IMP dehydrogenase](#) [IMD3](#)
- [IMP dehydrogenase](#) [IMD4](#)
- [GMP synthase](#) [GUA1](#)
- [guanylate kinase](#) [GUK1](#)
- [adenylosuccinate synthetase](#) [ADE12](#)
- [adenylosuccinate lyase](#) [ADE13](#)
- [adenylate kinase mitochondrial](#) [ADK1](#)
- [GTP:AMP phosphotransferase](#) [ADK2](#)
- [ribonucleotide reductase](#) [RNR1 RNR2 RNR3RNR4](#)
- [nucleoside diphosphate kinase](#) [YNK1](#)

[folate transformation](#)

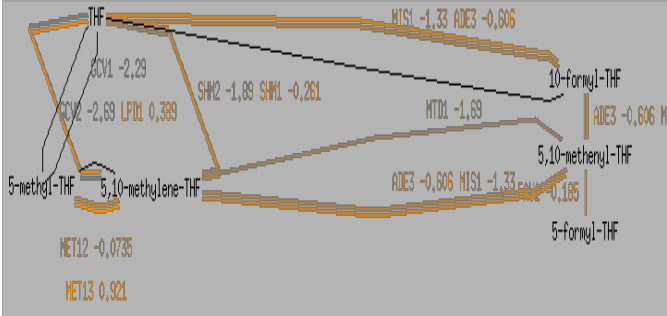

- [Serine hydroxymethyltransferase, mitochondrial](#) [SHM1](#)
- [serine hydroxymethyltransferase](#) [SHM2](#)
- [MTHFR](#) [MET13](#)
- [MTHFR](#) [MET12](#)
- [glycine cleavage](#) [GCV1 GCV2](#)

|  |  |                                                                                                                                                                                                                                                                                                                                                                                                            |
|--|--|------------------------------------------------------------------------------------------------------------------------------------------------------------------------------------------------------------------------------------------------------------------------------------------------------------------------------------------------------------------------------------------------------------|
|  |  | <a href="#">complex</a> <a href="#">PD1</a><br><a href="#">NAD-dependent</a> <a href="#">MTD1</a><br><a href="#">5,10-methylenetetrahydrofolate dehydrogenase</a><br><a href="#">mitochondrial C1-tetrahydrofolate synthase</a> <a href="#">MIS1</a><br><a href="#">C1-tetrahydrofolate synthase</a> <a href="#">ADE3</a><br><a href="#">5,10-methenyltetrahydrofolate synthetase</a> <a href="#">FAU1</a> |
|--|--|------------------------------------------------------------------------------------------------------------------------------------------------------------------------------------------------------------------------------------------------------------------------------------------------------------------------------------------------------------------------------------------------------------|

|                                 |  |                                                                                                                                                                                                                                                                                                                                                                                                                                                                                                                                                                                                                                                                                                                                                                                                                                                                                                                                                                                                                 |
|---------------------------------|--|-----------------------------------------------------------------------------------------------------------------------------------------------------------------------------------------------------------------------------------------------------------------------------------------------------------------------------------------------------------------------------------------------------------------------------------------------------------------------------------------------------------------------------------------------------------------------------------------------------------------------------------------------------------------------------------------------------------------------------------------------------------------------------------------------------------------------------------------------------------------------------------------------------------------------------------------------------------------------------------------------------------------|
| <a href="#">gluconeogenesis</a> |  | <a href="#">malic enzyme</a> <a href="#">MAE1</a><br><a href="#">pyruvate carboxylase</a> <a href="#">PYC2</a><br><a href="#">pyruvate carboxylase</a> <a href="#">PYC1</a><br><a href="#">cytosolic malate dehydrogenase</a> <a href="#">MDH2</a><br><a href="#">phosphoenolpyruvate carboxylkinase</a> <a href="#">PCK1</a><br><a href="#">enolase I</a> <a href="#">ENO1</a><br><a href="#">enolase</a> <a href="#">ENO2</a><br><a href="#">phosphoglycerate mutase</a> <a href="#">GPM1</a><br><a href="#">3-phosphoglycerate kinase</a> <a href="#">PGK1</a><br><a href="#">glyceraldehyde-3-phosphate dehydrogenase</a> <a href="#">TDH3</a><br><a href="#">glyceraldehyde 3-phosphate dehydrogenase</a> <a href="#">TDH2</a><br><a href="#">glyceraldehyde-3-phosphate dehydrogenase</a> <a href="#">TDH1</a><br><a href="#">aldolase</a> <a href="#">FBA1</a><br><a href="#">fructose-1,6-bisphosphatase</a> <a href="#">FBP1</a><br><a href="#">glucose-6-phosphate isomerase</a> <a href="#">PGI1</a> |
|---------------------------------|--|-----------------------------------------------------------------------------------------------------------------------------------------------------------------------------------------------------------------------------------------------------------------------------------------------------------------------------------------------------------------------------------------------------------------------------------------------------------------------------------------------------------------------------------------------------------------------------------------------------------------------------------------------------------------------------------------------------------------------------------------------------------------------------------------------------------------------------------------------------------------------------------------------------------------------------------------------------------------------------------------------------------------|

|                                                  |  |                                                                                                                                                                                                    |
|--------------------------------------------------|--|----------------------------------------------------------------------------------------------------------------------------------------------------------------------------------------------------|
| <a href="#">arginine degradation (anaerobic)</a> |  | <a href="#">arginase</a> <a href="#">CAR1</a><br><a href="#">ornithine aminotransferase</a> <a href="#">CAR2</a><br><a href="#">delta 1-pyrroline-5-carboxylate reductase</a> <a href="#">PRO3</a> |
|--------------------------------------------------|--|----------------------------------------------------------------------------------------------------------------------------------------------------------------------------------------------------|

|                                                             |                                                                                                                                                                                                                            |                                                                                                                                                                                                                                                                                                                                                                                                                                                                                                                                                                                                                                                                                                                                                                                                                              |
|-------------------------------------------------------------|----------------------------------------------------------------------------------------------------------------------------------------------------------------------------------------------------------------------------|------------------------------------------------------------------------------------------------------------------------------------------------------------------------------------------------------------------------------------------------------------------------------------------------------------------------------------------------------------------------------------------------------------------------------------------------------------------------------------------------------------------------------------------------------------------------------------------------------------------------------------------------------------------------------------------------------------------------------------------------------------------------------------------------------------------------------|
| <a href="#">allantoin degradation</a>                       | <pre> allantoin         DAL1 -2.15     allantoate         DAL2 -0.431     (S)-Ureidoglycolate         DAL3 -1.03       urea         DUR1,2     Urea-1-carboxylate         DUR1,2       CO<sub>2</sub> </pre>               | <a href="#">allantoinase</a> <a href="#">DAL1</a><br><a href="#">allantoicase</a> <a href="#">DAL2</a><br><a href="#">ureidoglycolate hydrolase</a> <a href="#">DAL3</a><br><a href="#">urea carboxylase / allophanate hydrolase</a> <a href="#">DUR1,2</a>                                                                                                                                                                                                                                                                                                                                                                                                                                                                                                                                                                  |
| <a href="#">leucine biosynthesis</a>                        | <pre> 2-keto-isovalerate           LEU9 -2.54 LEU4 -0.419      2-isopropylmalate         LEU1 -0.926     3-isopropylmalate         LEU2 -0.886     a-ketoisocaproate           BAT2 0.563 BAT1 -1.28      L-leucine </pre> | <a href="#">alpha-isopropylmalate synthase</a> <a href="#">LEU4</a><br><a href="#">alpha-isopropylmalate synthase, minor isozyme</a> <a href="#">LEU9</a><br><a href="#">isopropylmalate isomerase</a> <a href="#">LEU1</a><br><a href="#">beta-IPM dehydrogenase</a> <a href="#">LEU2</a><br><a href="#">branched-chain amino acid aminotransferase</a> <a href="#">BAT1</a><br><a href="#">branched-chain amino acid transaminase</a> <a href="#">BAT2</a>                                                                                                                                                                                                                                                                                                                                                                 |
| <a href="#">valine degradation</a>                          | <pre> L-valine           BAT2 0.563 BAT1 -1.28      2-keto-isovalerate         PDC6 4.34 PDC5 -0.264         PDC1 -0.25     isobutanal           SFA1 0.394 ADH5 0.417           ADH4 -0.763      isobutyl alcohol </pre>  | <a href="#">branched-chain amino acid aminotransferase</a> <a href="#">BAT1</a><br><a href="#">branched-chain amino acid transaminase</a> <a href="#">BAT2</a><br><a href="#">pyruvate decarboxylase / decarboxylase</a> <a href="#">PDC1</a><br><a href="#">pyruvate decarboxylase / decarboxylase</a> <a href="#">PDC5</a><br><a href="#">pyruvate decarboxylase / decarboxylase</a> <a href="#">PDC6</a><br><a href="#">alcohol dehydrogenase</a> <a href="#">ADH1</a><br><a href="#">alcohol dehydrogenase</a> <a href="#">ADH2</a><br><a href="#">alcohol dehydrogenase</a> <a href="#">ADH3</a><br><a href="#">alcohol dehydrogenase</a> <a href="#">ADH4</a><br><a href="#">alcohol dehydrogenase</a> <a href="#">ADH5</a><br><a href="#">formaldehyde dehydrogenase / alcohol dehydrogenase</a> <a href="#">SFA1</a> |
| <a href="#">citrulline biosynthesis</a>                     | <pre> L-glutamine         CPA1 -0.846 CPA2 -1.31     carbamoyl-phosphate         ARG3 -3.02     citrulline </pre>                                                                                                          | <a href="#">carbamoyl phosphate synthetase</a> <a href="#">CPA1</a> <a href="#">CPA2</a><br><a href="#">ornithine carbamoyltransferase</a> <a href="#">ARG3</a>                                                                                                                                                                                                                                                                                                                                                                                                                                                                                                                                                                                                                                                              |
| <a href="#">serine biosynthesis from 3-phosphoglycerate</a> | <pre> 3-phosphoglycerate           SER33 0.522 SER3 -2.11      3-phospho-hydroxypyruvate         SER1 -0.612     3-phospho-serine         SER2 -1.25     L-serine </pre>                                                   | <a href="#">3-phosphoglycerate dehydrogenase</a> <a href="#">SER3</a><br><a href="#">3-phosphoglycerate dehydrogenase</a> <a href="#">SER33</a><br><a href="#">phosphoserine transaminase</a> <a href="#">SER1</a><br><a href="#">phosphoserine phosphatase</a> <a href="#">SER2</a>                                                                                                                                                                                                                                                                                                                                                                                                                                                                                                                                         |

[glutathione-glutaredoxin redox reactions](#)

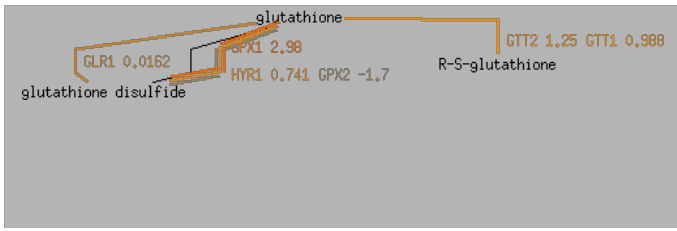

- [glutathione oxidoreductase](#) [GLR1](#)
- [glutathione transferase](#) [GTT1](#)
- [glutathione transferase](#) [GTT2](#)
- [Glutathione peroxidase](#) [GPX2](#)
- [glutathione-peroxidase](#) [HYR1](#)
- [Glutathione peroxidase](#) [GPX1](#)

[glyoxylate cycle](#)

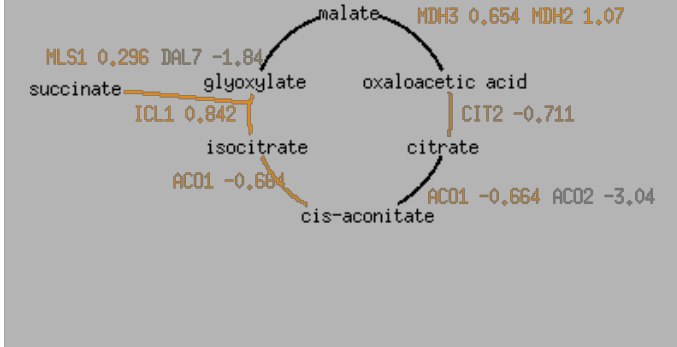

- [cytosolic malate dehydrogenase](#) [MDH2](#)
- [peroxisome malate dehydrogenase](#) [MDH3](#)
- [citrate synthase](#) [CIT2](#)
- [aconitate hydratase](#) [ACO2](#)
- [aconitase](#) [ACO1](#)
- [isocitrate lyase](#) [ICL1](#)
- [malate synthase 2](#) [DAL7](#)
- [malate synthase](#) [MLS1](#)

[isoleucine degradation](#)

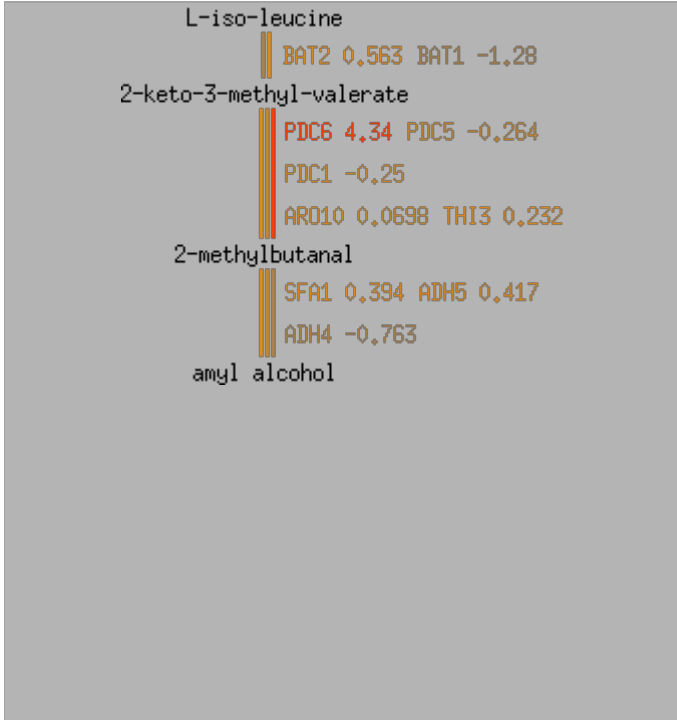

- [branched-chain amino acid aminotransferase](#) [BAT1](#)
- [branched-chain amino acid transaminase](#) [BAT2](#)
- [ketoisocaproate decarboxylase / decarboxylase](#) [THI3](#)
- [decarboxylase](#) [ARO10](#)
- [pyruvate decarboxylase / decarboxylase](#) [PDC1](#)
- [pyruvate decarboxylase / decarboxylase](#) [PDC5](#)
- [pyruvate decarboxylase / decarboxylase](#) [PDC6](#)
- [alcohol dehydrogenase](#) [ADH1](#)
- [alcohol dehydrogenase](#) [ADH2](#)
- [alcohol dehydrogenase](#) [ADH3](#)
- [alcohol dehydrogenase](#) [ADH4](#)
- [alcohol dehydrogenase](#) [ADH5](#)
- [formaldehyde dehydrogenase / alcohol dehydrogenase](#) [SFA1](#)



|                                                                    |                                                                                      |                                                                                                                                                                                                                                                                                                                                                                                                                                                                                                                                                                                                                                                                                                                                                                                                                                                                                  |
|--------------------------------------------------------------------|--------------------------------------------------------------------------------------|----------------------------------------------------------------------------------------------------------------------------------------------------------------------------------------------------------------------------------------------------------------------------------------------------------------------------------------------------------------------------------------------------------------------------------------------------------------------------------------------------------------------------------------------------------------------------------------------------------------------------------------------------------------------------------------------------------------------------------------------------------------------------------------------------------------------------------------------------------------------------------|
| <a href="#">de novo biosynthesis of pyrimidine ribonucleotides</a> | 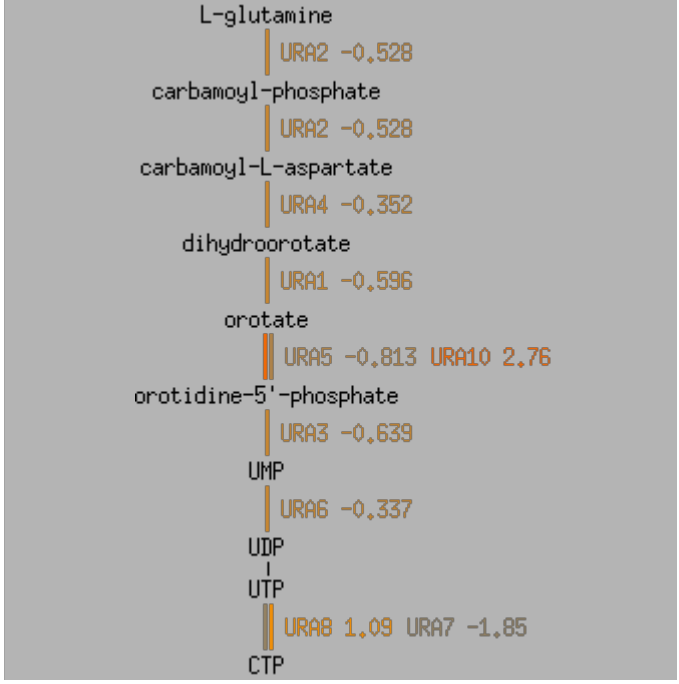   | <a href="#">carbamyl phosphate synthase / aspartate transcarbamylase</a> <a href="#">URA2</a><br><a href="#">dihydroorotase</a> <a href="#">URA4</a><br><a href="#">dihydroorotate dehydrogenase</a> <a href="#">URA1</a><br><a href="#">orotate phosphoribosyltransferase</a> <a href="#">URA10</a><br><a href="#">orotate phosphoribosyltransferase</a> <a href="#">URA5</a><br><a href="#">orotidine-5'-phosphate decarboxylase</a> <a href="#">URA3</a><br><a href="#">uridylyate kinase</a> <a href="#">URA6</a><br><a href="#">CTP synthase</a> <a href="#">URA7</a><br><a href="#">CTP synthase</a> <a href="#">URA8</a>                                                                                                                                                                                                                                                  |
| <a href="#">acetoin biosynthesis II</a>                            |   | <a href="#">pyruvate decarboxylase / decarboxylase</a> <a href="#">PDC1</a><br><a href="#">pyruvate decarboxylase / decarboxylase</a> <a href="#">PDC5</a><br><a href="#">pyruvate decarboxylase / decarboxylase</a> <a href="#">PDC6</a>                                                                                                                                                                                                                                                                                                                                                                                                                                                                                                                                                                                                                                        |
| <a href="#">sucrose degradation</a>                                |  | <a href="#">invertase</a> <a href="#">SUC2</a>                                                                                                                                                                                                                                                                                                                                                                                                                                                                                                                                                                                                                                                                                                                                                                                                                                   |
| <a href="#">glycine biosynthesis from glyoxylate</a>               |  | <a href="#">alanine:glyoxylate aminotransferase</a> <a href="#">AGX1</a>                                                                                                                                                                                                                                                                                                                                                                                                                                                                                                                                                                                                                                                                                                                                                                                                         |
| <a href="#">phenylalanine degradation</a>                          |  | <a href="#">aromatic amino acid aminotransferase I</a> <a href="#">ARO8</a><br><a href="#">aromatic amino acid aminotransferase II</a> <a href="#">ARO9</a><br><a href="#">pyruvate decarboxylase / decarboxylase</a> <a href="#">PDC1</a><br><a href="#">pyruvate decarboxylase / decarboxylase</a> <a href="#">PDC5</a><br><a href="#">pyruvate decarboxylase / decarboxylase</a> <a href="#">PDC6</a><br><a href="#">decarboxylase</a> <a href="#">ARO10</a><br><a href="#">alcohol dehydrogenase</a> <a href="#">ADH1</a><br><a href="#">alcohol dehydrogenase</a> <a href="#">ADH2</a><br><a href="#">alcohol dehydrogenase</a> <a href="#">ADH3</a><br><a href="#">alcohol dehydrogenase</a> <a href="#">ADH4</a><br><a href="#">alcohol dehydrogenase</a> <a href="#">ADH5</a><br><a href="#">formaldehyde dehydrogenase / alcohol dehydrogenase</a> <a href="#">SFA1</a> |

|                                                                   |                                                                                      |                                                                                                                                                                                                                                                                                                                                                                                                                                                                                                                                                                                                                                                                                                                |
|-------------------------------------------------------------------|--------------------------------------------------------------------------------------|----------------------------------------------------------------------------------------------------------------------------------------------------------------------------------------------------------------------------------------------------------------------------------------------------------------------------------------------------------------------------------------------------------------------------------------------------------------------------------------------------------------------------------------------------------------------------------------------------------------------------------------------------------------------------------------------------------------|
| <a href="#">beta-alanine biosynthesis</a>                         | 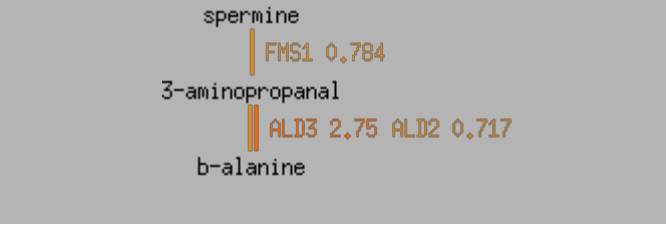   | <a href="#">amine oxidase</a> <a href="#">FMS1</a><br><a href="#">aldehyde dehydrogenase (stress inducible cytoplasmic)</a> <a href="#">ALD2</a><br><a href="#">aldehyde dehydrogenase (stress inducible cytoplasmic)</a> <a href="#">ALD3</a>                                                                                                                                                                                                                                                                                                                                                                                                                                                                 |
| <a href="#">fatty acid oxidation pathway</a>                      |    | <a href="#">fatty acid transporter</a> <a href="#">FAT1</a><br><a href="#">acyl-CoA synthetase</a> <a href="#">FAA2</a><br><a href="#">acyl-CoA synthase</a> <a href="#">FAA3</a><br><a href="#">long chain fatty acyl:CoA synthetase</a> <a href="#">FAA4</a><br><a href="#">long chain fatty acyl:CoA synthetase</a> <a href="#">FAA1</a><br><a href="#">d3,d2-Enoyl-CoA Isomerase</a> <a href="#">ECI1</a><br><a href="#">delta(3,5)-delta(2,4)-dienoyl-CoA isomerase</a> <a href="#">DCI1</a><br><a href="#">fatty-acyl coenzyme A oxidase</a> <a href="#">POX1</a><br><a href="#">3-hydroxyacyl-CoA dehydrogenase</a> <a href="#">FOX2</a><br><a href="#">3-oxoacyl CoA thiolase</a> <a href="#">POT1</a> |
| <a href="#">superpathway of glutamate biosynthesis</a>            |   | <a href="#">NADP-dependent isocitrate dehydrogenase</a> <a href="#">IDP1</a><br><a href="#">NADP-dependent isocitrate dehydrogenase</a> <a href="#">IDP2</a><br><a href="#">NADP-dependent isocitrate dehydrogenase</a> <a href="#">IDP3</a><br><a href="#">glutamine synthetase</a> <a href="#">GLN1</a><br><a href="#">NADP-dependent glutamate dehydrogenase</a> <a href="#">GDH3</a><br><a href="#">NADP-dependent glutamate dehydrogenase</a> <a href="#">GDH1</a><br><a href="#">glutamate synthase (NADH)</a> <a href="#">GLT1</a>                                                                                                                                                                      |
| <a href="#">oxidative branch of the pentose phosphate pathway</a> |  | <a href="#">glucose-6-phosphate dehydrogenase</a> <a href="#">ZWF1</a><br><a href="#">6-phosphogluconolactonase</a> <a href="#">SOL3</a><br><a href="#">6-phosphogluconolactonase</a> <a href="#">SOL4</a><br><a href="#">6-phosphogluconate dehydrogenase</a> <a href="#">GND2</a><br><a href="#">6-phosphogluconate dehydrogenase, decarboxylating</a> <a href="#">GND1</a>                                                                                                                                                                                                                                                                                                                                  |

[superpathway of glucose fermentation](#)

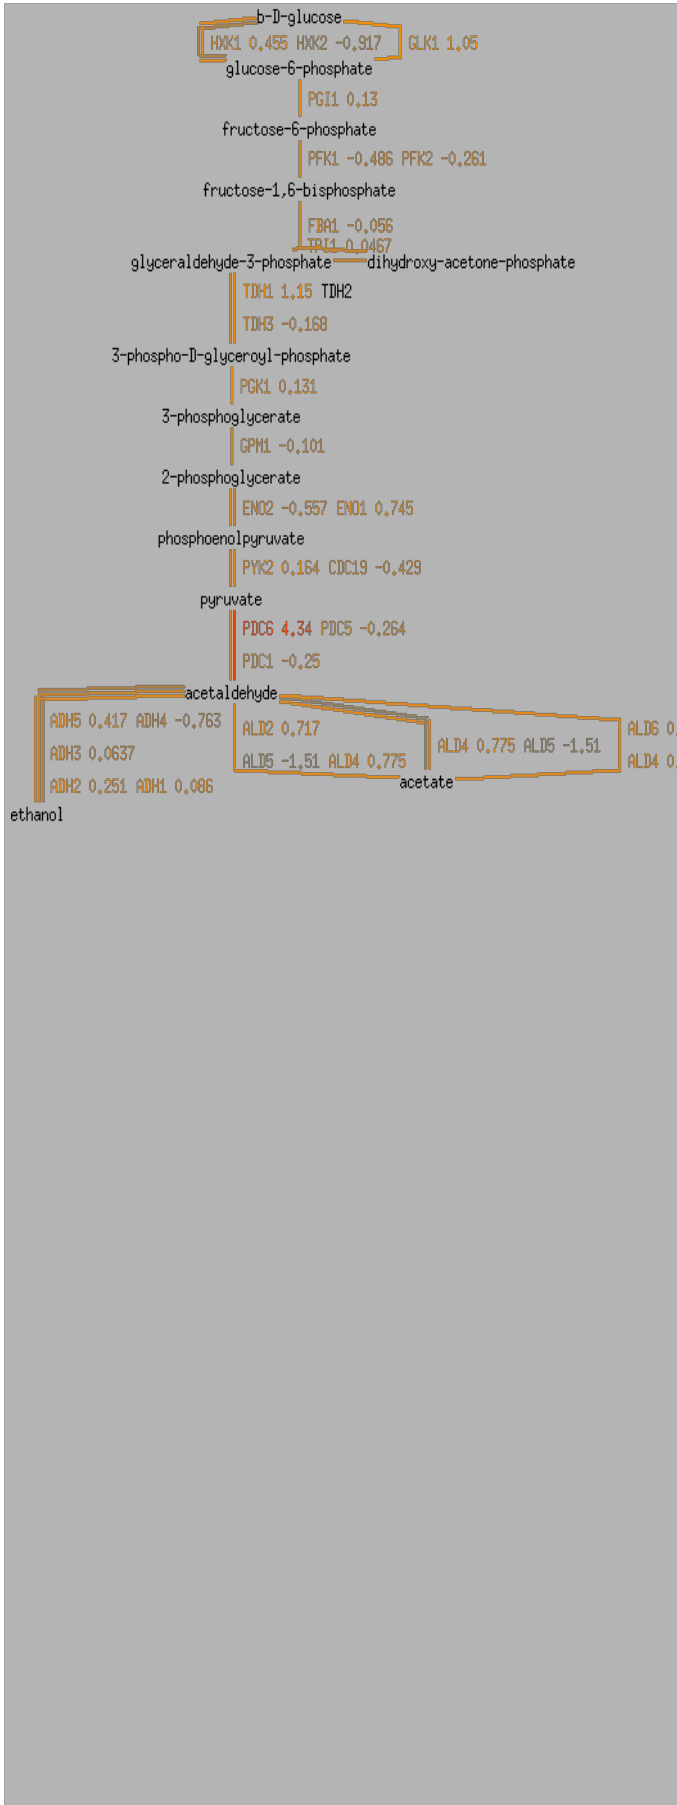

|                                                                       |                                           |
|-----------------------------------------------------------------------|-------------------------------------------|
| <a href="#">hexokinase II</a>                                         | <a href="#">HXK2</a>                      |
| <a href="#">hexokinase I</a>                                          | <a href="#">HXK1</a>                      |
| <a href="#">glucokinase</a>                                           | <a href="#">GLK1</a>                      |
| <a href="#">glucose-6-phosphate isomerase</a>                         | <a href="#">PGI1</a>                      |
| <a href="#">phosphofructokinase</a>                                   | <a href="#">PFK1</a> <a href="#">PFK2</a> |
| <a href="#">aldolase</a>                                              | <a href="#">FBA1</a>                      |
| <a href="#">triosephosphate isomerase</a>                             | <a href="#">TPI1</a>                      |
| <a href="#">glyceraldehyde-3-phosphate dehydrogenase</a>              | <a href="#">TDH3</a>                      |
| <a href="#">glyceraldehyde 3-phosphate dehydrogenase</a>              | <a href="#">TDH2</a>                      |
| <a href="#">glyceraldehyde-3-phosphate dehydrogenase</a>              | <a href="#">TDH1</a>                      |
| <a href="#">3-phosphoglycerate kinase</a>                             | <a href="#">PGK1</a>                      |
| <a href="#">phosphoglycerate mutase</a>                               | <a href="#">GPM1</a>                      |
| <a href="#">enolase I</a>                                             | <a href="#">ENO1</a>                      |
| <a href="#">enolase</a>                                               | <a href="#">ENO2</a>                      |
| <a href="#">pyruvate kinase</a>                                       | <a href="#">CDC19</a>                     |
| <a href="#">pyruvate kinase</a>                                       | <a href="#">PYK2</a>                      |
| <a href="#">pyruvate decarboxylase / decarboxylase</a>                | <a href="#">PDC1</a>                      |
| <a href="#">pyruvate decarboxylase / decarboxylase</a>                | <a href="#">PDC5</a>                      |
| <a href="#">pyruvate decarboxylase / decarboxylase</a>                | <a href="#">PDC6</a>                      |
| <a href="#">aldehyde dehydrogenase (stress inducible cytoplasmic)</a> | <a href="#">ALD2</a>                      |
| <a href="#">aldehyde dehydrogenase (major mitochondrial)</a>          | <a href="#">ALD4</a>                      |
| <a href="#">aldehyde dehydrogenase (minor mitochondrial)</a>          | <a href="#">ALD5</a>                      |
| <a href="#">aldehyde dehydrogenase (major cytoplasmic)</a>            | <a href="#">ALD6</a>                      |
| <a href="#">alcohol dehydrogenase</a>                                 | <a href="#">ADH1</a>                      |
| <a href="#">alcohol dehydrogenase</a>                                 | <a href="#">ADH2</a>                      |
| <a href="#">alcohol dehydrogenase</a>                                 | <a href="#">ADH3</a>                      |
| <a href="#">alcohol dehydrogenase</a>                                 | <a href="#">ADH4</a>                      |
| <a href="#">alcohol dehydrogenase</a>                                 | <a href="#">ADH5</a>                      |

|                                                                         |  |                                                                                                                                                                                                                                                                                                                                                                                                                                                                                                                                                                                                                                                                                                                                                                                                                           |
|-------------------------------------------------------------------------|--|---------------------------------------------------------------------------------------------------------------------------------------------------------------------------------------------------------------------------------------------------------------------------------------------------------------------------------------------------------------------------------------------------------------------------------------------------------------------------------------------------------------------------------------------------------------------------------------------------------------------------------------------------------------------------------------------------------------------------------------------------------------------------------------------------------------------------|
| <a href="#">tryptophan degradation</a>                                  |  | <a href="#">aromatic amino acid aminotransferase I</a> <a href="#">ARO8</a><br><a href="#">aromatic amino acid aminotransferase II</a> <a href="#">ARO9</a><br><a href="#">pyruvate decarboxylase / decarboxylase</a> <a href="#">PDC1</a><br><a href="#">pyruvate decarboxylase / decarboxylase</a> <a href="#">PDC5</a><br><a href="#">pyruvate decarboxylase / decarboxylase</a> <a href="#">PDC6</a><br><a href="#">alcohol dehydrogenase</a> <a href="#">ADH1</a><br><a href="#">alcohol dehydrogenase</a> <a href="#">ADH2</a><br><a href="#">alcohol dehydrogenase</a> <a href="#">ADH3</a><br><a href="#">alcohol dehydrogenase</a> <a href="#">ADH4</a><br><a href="#">alcohol dehydrogenase</a> <a href="#">ADH5</a><br><a href="#">formaldehyde dehydrogenase / alcohol dehydrogenase</a> <a href="#">SFA1</a> |
| <a href="#">salvage pathways of pyrimidine ribonucleotide S</a>         |  | <a href="#">cytidine deaminase</a> <a href="#">CDD1</a><br><a href="#">deoxycytidine kinase / cytidine kinase / uridine kinase</a> <a href="#">URK1</a><br><a href="#">nicotinic acid riboside hydrolase [multifunctional]</a> <a href="#">URH1</a><br><a href="#">cytosine deaminase</a> <a href="#">FCY1</a><br><a href="#">UPRTase</a> <a href="#">FUR1</a><br><a href="#">nucleoside diphosphate kinase</a> <a href="#">YNK1</a>                                                                                                                                                                                                                                                                                                                                                                                      |
| <a href="#">removal of superoxide radicals</a>                          |  | <a href="#">cytoplasmic superoxide dismutase</a> <a href="#">SOD1</a><br><a href="#">mitochondrial superoxide dismutase</a> <a href="#">SOD2</a><br><a href="#">catalase A</a> <a href="#">CTA1</a><br><a href="#">catalase T</a> <a href="#">CTT1</a>                                                                                                                                                                                                                                                                                                                                                                                                                                                                                                                                                                    |
| <a href="#">de novo biosynthesis of pyrimidine deoxyribonucleotides</a> |  | <a href="#">ribonucleotide reductase</a> <a href="#">RNR1</a> <a href="#">RNR2</a> <a href="#">RNR3</a> <a href="#">RNR4</a><br><a href="#">dUTP pyrophosphatase</a> <a href="#">DUT1</a><br><a href="#">thymidylate synthase</a> <a href="#">CDC21</a><br><a href="#">uridylylate kinase / thymidylate kinase</a> <a href="#">CDC8</a><br><a href="#">nucleoside diphosphate kinase</a> <a href="#">YNK1</a>                                                                                                                                                                                                                                                                                                                                                                                                             |

[non-oxidative branch of the pentose phosphate pathway](#)

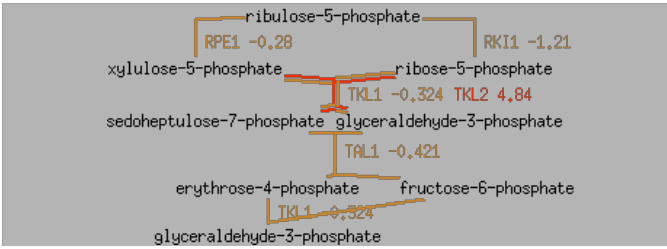

- [D-ribulose-5-Phosphate 3-epimerase](#) [RPE1](#)
- [ribose-5-phosphate ketol-isomerase](#) [RKI1](#)
- [transketolase](#) [TKL2](#)
- [transaldolase](#) [TAL1](#)
- [transketolase](#) [TKL1](#)

[TCA cycle, aerobic respiration](#)

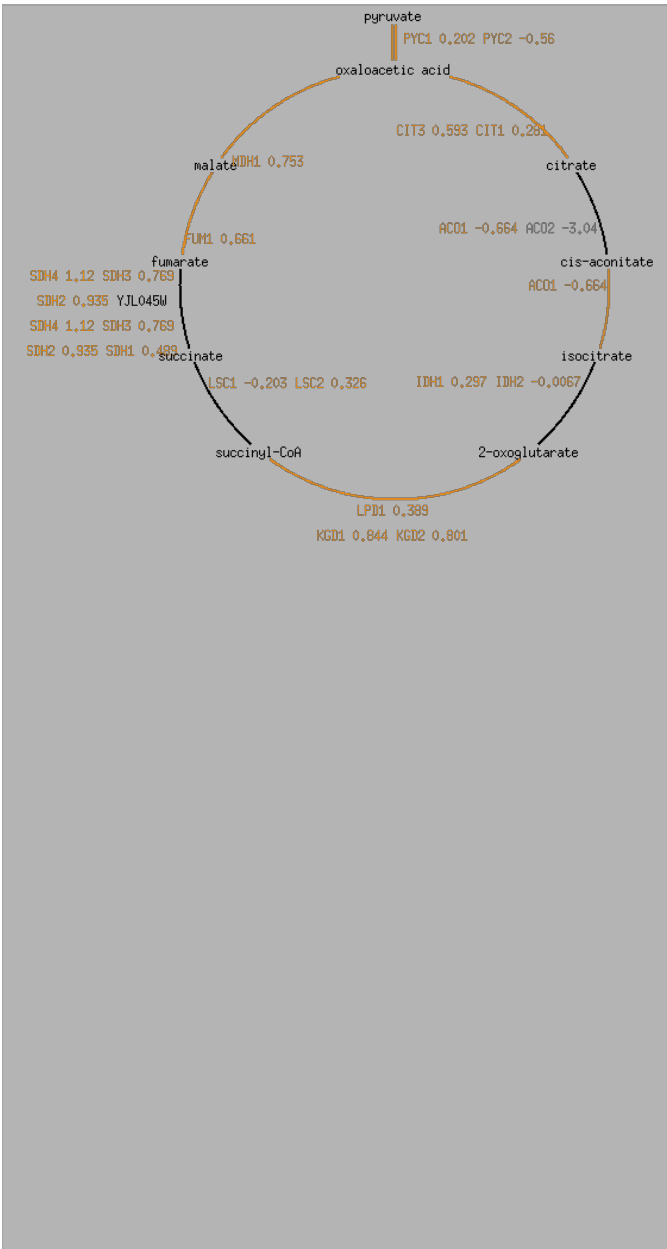

- [pyruvate carboxylase](#) [PYC2](#)
- [pyruvate carboxylase](#) [PYC1](#)
- [mitochondrial malate dehydrogenase](#) [MDH1](#)
- [citrate synthase](#) [CIT1](#)
- [citrate synthase](#) [CIT3](#)
- [aconitate hydratase](#) [ACO2](#)
- [aconitase](#) [ACO1](#)
- [NAD-dependent isocitrate dehydrogenase](#) [IDH1](#) [IDH2](#)
- [2-ketoglutarate dehydrogenase complex](#) [LPD1](#) [KGD1](#) [KGD2](#)
- [succinyl-CoA ligase](#) [LSC1](#) [LSC2](#)
- [succinate dehydrogenase \(ubiquinone\)](#) [SDH4](#) [SDH3](#) [SDH2](#) [SDH1](#)
- [fumarate hydratase](#) [FUM1](#)

[myo-inositol biosynthesis](#)

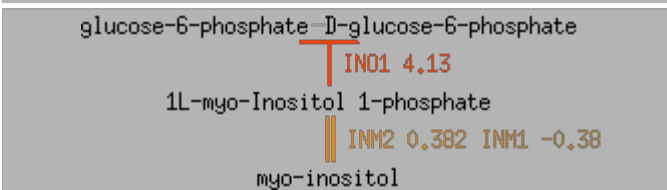

- [L-myo-inositol-1-phosphate synthase](#) [INO1](#)
- [inositol monophosphatase](#) [INM1](#)
- [inositol monophosphate](#) [INM2](#)

**SI Table 2.** Differentially expressed genes 2 h after limonene exposure. Genes are categorized based on either cellular compartments and/or biological processes.

| Gene                                  | Description                                                                                                                                                                                                                                           | FC <sup>a</sup> | P value <sup>b</sup> |
|---------------------------------------|-------------------------------------------------------------------------------------------------------------------------------------------------------------------------------------------------------------------------------------------------------|-----------------|----------------------|
| <b>Cell wall cellular compartment</b> |                                                                                                                                                                                                                                                       |                 |                      |
| <i>Cytokinesis</i>                    |                                                                                                                                                                                                                                                       |                 |                      |
| XBP1                                  | Transcriptional repressor that binds to promoter sequences of the cyclin genes, CYS3, and SMF2; expression is induced by stress or starvation during mitosis, and late in meiosis; member of the Swi4p/Mbp1p family; potential Cdc28p substrate, XBP1 | 2.1             | 2.58E-05             |
| AFR1                                  | Alpha-factor pheromone receptor regulator, negatively regulates pheromone receptor signaling; required for normal mating projection (shmoo) formation; required for Spa2p to recruit Mpk1p to shmoo tip during mating; interacts with Cdc12p, AFR1    | 1.9             | 1.81E-04             |
| MET30                                 | F-box protein containing five copies of the WD40 motif, controls cell cycle function, sulfur metabolism, and methionine biosynthesis as part of the ubiquitin ligase complex; interacts with and regulates Met4p, localizes within the nucleus, MET30 | 1.6             | 2.18E-03             |
| DSE4                                  | Daughter cell-specific secreted protein with similarity to glucanases, degrades cell wall from the daughter side causing daughter to separate from mother, DSE4                                                                                       | -1.9            | 2.50E-04             |
| GAS2                                  | 1,3-beta-glucanosyltransferase, involved with Gas4p in spore wall assembly; has similarity to Gas1p, GAS2                                                                                                                                             | -2.0            | 8.47E-04             |
| EGT2                                  | Glycosylphosphatidylinositol (GPI)-anchored cell wall endoglucanase required for proper cell separation after cytokinesis, expression is activated by Swi5p and tightly regulated in a cell cycle-dependent manner, EGT2                              | -2.1            | 7.20E-03             |
| SUN4                                  | Cell wall protein related to glucanases, possibly involved in cell wall septation; member of the SUN family, SUN4                                                                                                                                     | -2.2            | 1.47E-04             |
| GAS3                                  | Putative 1,3-beta-glucanosyltransferase, has similarity to Gas1p; localizes to the cell wall, GAS3                                                                                                                                                    | -2.3            | 6.04E-04             |
| CTS1                                  | Endochitinase, required for cell separation after mitosis; transcriptional activation during late G and early M cell cycle phases is mediated by transcription factor Ace2p, CTS1                                                                     | -2.4            | 9.10E-04             |
| UTR2                                  | Cell wall protein that functions in the transfer of chitin to beta(1-6)glucan; putative chitin transglycosidase; glycosylphosphatidylinositol (GPI)-anchored protein localized to the bud neck; has a role in cell wall maintenance, UTR2             | -2.6            | 3.22E-04             |
| SCW11                                 | Cell wall protein with similarity to glucanases; may play a role in conjugation during mating based on its regulation by Ste12p, SCW11                                                                                                                | -3.0            | 3.29E-04             |
| DSE1                                  | Daughter cell-specific protein, may participate in                                                                                                                                                                                                    | -3.1            | 1.03E-               |

|                               |                                                                                                                                                                                                                                                                     |      |          |
|-------------------------------|---------------------------------------------------------------------------------------------------------------------------------------------------------------------------------------------------------------------------------------------------------------------|------|----------|
|                               | pathways regulating cell wall metabolism; deletion affects cell separation after division and sensitivity to drugs targeted against the cell wall, DSE1                                                                                                             |      | 03       |
| DSE2                          | Daughter cell-specific secreted protein with similarity to glucanases, degrades cell wall from the daughter side causing daughter to separate from mother; expression is repressed by cAMP, DSE2                                                                    | -3.2 | 7.35E-04 |
| SPS4                          | Protein whose expression is induced during sporulation; not required for sporulation; heterologous expression in E. coli induces the SOS response that senses DNA damage, SPS4                                                                                      | -3.7 | 3.24E-06 |
| <i>Cell wall organization</i> |                                                                                                                                                                                                                                                                     |      |          |
| YGP1                          | Cell wall-related secretory glycoprotein; induced by nutrient deprivation-associated growth arrest and upon entry into stationary phase; may be involved in adaptation prior to stationary phase entry; has similarity to Sps100p, YGP1                             | 4.0  | 1.13E-07 |
| PIR3                          | O-glycosylated covalently-bound cell wall protein required for cell wall stability; expression is cell cycle regulated, peaking in M/G1 and also subject to regulation by the cell integrity pathway, PIR3                                                          | 5.0  | 9.39E-07 |
| FIT2                          | Mannoprotein that is incorporated into the cell wall via a glycosylphosphatidylinositol (GPI) anchor, involved in the retention of siderophore-iron in the cell wall, FIT2                                                                                          | 2.0  | 6.39E-05 |
| TIP1                          | Major cell wall mannoprotein with possible lipase activity; transcription is induced by heat- and cold-shock; member of the Srp1p/Tip1p family of serine-alanine-rich proteins, TIP1                                                                                | 2.1  | 1.44E-04 |
| YPK2                          | Protein kinase with similarity to serine/threonine protein kinase Ypk1p; functionally redundant with YPK1 at the genetic level; participates in a signaling pathway required for optimal cell wall integrity; homolog of mammalian kinase SGK, YPK2                 | 1.8  | 5.36E-04 |
| SPI1                          | GPI-anchored cell wall protein involved in weak acid resistance; basal expression requires Msn2p/Msn4p; expression is induced under conditions of stress and during the diauxic shift; similar to Sed1p, SPI1                                                       | 4.7  | 8.17E-04 |
| SNA3                          | Integral membrane protein localized to vacuolar intraluminal vesicles, computational analysis of large-scale protein-protein interaction data suggests a possible role in either cell wall synthesis or protein-vacuolar targeting, SNA3                            | 1.2  | 8.98E-04 |
| FRT2                          | Tail-anchored endoplasmic reticulum membrane protein, interacts with homolog Frt1p but is not a substrate of calcineurin (unlike Frt1p), promotes growth in conditions of high Na <sup>+</sup> , alkaline pH, or cell wall stress; potential Cdc28p substrate, FRT2 | 1.7  | 3.36E-03 |
| USV1                          | Putative transcription factor containing a C2H2 zinc finger; mutation affects transcriptional regulation of genes                                                                                                                                                   | 1.2  | 4.26E-03 |

|                                |                                                                                                                                                                                                                                                                      |     |          |
|--------------------------------|----------------------------------------------------------------------------------------------------------------------------------------------------------------------------------------------------------------------------------------------------------------------|-----|----------|
|                                | involved in protein folding, ATP binding, and cell wall biosynthesis, USV1                                                                                                                                                                                           |     |          |
| PST1                           | Cell wall protein that contains a putative GPI-attachment site; secreted by regenerating protoplasts; up-regulated by activation of the cell integrity pathway, as mediated by Rlm1p; upregulated by cell wall damage via disruption of FKS1, PST1                   | 1.9 | 4.73E-03 |
| ECM4                           | Omega class glutathione transferase; not essential; similar to Ygr154cp; green fluorescent protein (GFP)-fusion protein localizes to the cytoplasm, ECM4                                                                                                             | 1.4 | 2.94E-04 |
| TDH1                           | Glyceraldehyde-3-phosphate dehydrogenase, isozyme 1, involved in glycolysis and gluconeogenesis; tetramer that catalyzes the reaction of glyceraldehyde-3-phosphate to 1,3 bis-phosphoglycerate; detected in the cytoplasm and cell wall [Source:SGD;Acc:S000003588] | 1.1 | 5.38E-03 |
| FIT3                           | Mannoprotein that is incorporated into the cell wall via a glycosylphosphatidylinositol (GPI) anchor, involved in the retention of siderophore-iron in the cell wall, FIT3                                                                                           | 1.7 | 5.54E-03 |
| Hsp150                         | O-mannosylated heat shock protein that is secreted and covalently attached to the cell wall via beta-1,3-glucan and disulfide bridges; required for cell wall stability; induced by heat shock, oxidative stress, and nitrogen limitation, HSP150                    | 1.0 | 6.70E-03 |
| CWP1                           | Cell wall mannoprotein, linked to a beta-1,3- and beta-1,6-glucan heteropolymer through a phosphodiester bond; involved in cell wall organization, CWP1                                                                                                              | 1.1 | 7.41E-03 |
| YPS6                           | Putative GPI-anchored aspartic protease, YPS6                                                                                                                                                                                                                        | 1.2 | 8.35E-03 |
| GSC2                           | Catalytic subunit of 1,3-beta-glucan synthase, involved in formation of the inner layer of the spore wall; activity positively regulated by Rho1p and negatively by Smk1p; has similarity to an alternate catalytic subunit, Fks1p (Gsc1p), GSC2                     | 1.6 | 1.04E-03 |
| RIM21                          | Component of the RIM101 pathway, has a role in cell wall construction and alkaline pH response; has similarity to <i>A. nidulans</i> PalH, RIM21                                                                                                                     | 1.1 | 5.03E-03 |
| SLT2                           | Serine/threonine MAP kinase involved in regulating the maintenance of cell wall integrity and progression through the cell cycle; regulated by the PKC1-mediated signaling pathway,                                                                                  | 0.9 | 0.057308 |
| MLP1                           | Protein kinase implicated in the Slt2p mitogen-activated (MAP) kinase signaling pathway; associates with Rlm1p, ---                                                                                                                                                  | 2.1 | 1.38E-03 |
| ECM4                           | Omega class glutathione transferase; not essential; similar to Ygr154cp; green fluorescent protein (GFP)-fusion protein localizes to the cytoplasm, ECM4                                                                                                             | 1.4 | 2.94E-04 |
| FBP26                          | Fructose-2,6-bisphosphatase, required for glucose metabolism                                                                                                                                                                                                         | 1.4 | 7.85E-04 |
| <b>Transmembrane transport</b> |                                                                                                                                                                                                                                                                      |     |          |



|       |                                                                                                                                                                                                                                                   |     |          |
|-------|---------------------------------------------------------------------------------------------------------------------------------------------------------------------------------------------------------------------------------------------------|-----|----------|
| AGP3  | Low-affinity amino acid permease, may act to supply the cell with amino acids as nitrogen source in nitrogen-poor conditions; transcription is induced under conditions of sulfur limitation, AGP3                                                | 5.1 | 3.92E-06 |
| MUP1  | High affinity methionine permease, integral membrane protein with 13 putative membrane-spanning regions; also involved in cysteine uptake, MUP1                                                                                                   | 4.6 | 1.75E-04 |
| YCT1  | High-affinity cysteine-specific transporter with similarity to the Dal5p family of transporters; green fluorescent protein (GFP)-fusion protein localizes to the endoplasmic reticulum; YCT1 is not an essential gene, YCT1                       | 4.3 | 3.25E-04 |
| HXT5  | Hexose transporter with moderate affinity for glucose, induced in the presence of non-fermentable carbon sources, induced by a decrease in growth rate, contains an extended N-terminal domain relative to other HXTs,                            | 3.9 | 8.32E-06 |
| STL1  | Glycerol proton symporter of the plasma membrane, subject to glucose-induced inactivation, strongly but transiently induced when cells are subjected to osmotic shock, STL1                                                                       | 3.9 | 2.35E-03 |
| PDR15 | Plasma membrane ATP binding cassette (ABC) transporter, multidrug transporter and general stress response factor implicated in cellular detoxification; regulated by Pdr1p, Pdr3p and Pdr8p; promoter contains a PDR responsive element, PDR15    | 3.2 | 4.08E-04 |
| MMP1  | High-affinity S-methylmethionine permease, required for utilization of S-methylmethionine as a sulfur source; has similarity to S-adenosylmethionine permease Sam3p, MMP1                                                                         | 2.3 | 1.05E-03 |
| SAM3  | High-affinity S-adenosylmethionine permease, required for utilization of S-adenosylmethionine as a sulfur source; has similarity to S-methylmethionine permease Mmp1p, SAM3                                                                       | 2.2 | 1.71E-03 |
| JEN1  | Lactate transporter, required for uptake of lactate and pyruvate; phosphorylated; expression is derepressed by transcriptional activator Cat8p during respiratory growth, and repressed in the presence of glucose, fructose, and mannose, JEN1   | 2.2 | 2.20E-03 |
| JEN1  | Lactate transporter, required for uptake of lactate and pyruvate; phosphorylated; expression is derepressed by transcriptional activator Cat8p during respiratory growth, and repressed in the presence of glucose, fructose, and mannose, JEN1   | 2.2 | 2.20E-03 |
| CSR2  | Nuclear protein with a potential regulatory role in utilization of galactose and nonfermentable carbon sources; overproduction suppresses the lethality at high temperature of a chs5 spa2 double null mutation; potential Cdc28p substrate, CSR2 | 2.1 | 3.02E-05 |
| PDR5  | Plasma membrane ATP-binding cassette (ABC) transporter, short-lived multidrug transporter actively regulated by Pdr1p; also involved in steroid transport,                                                                                        | 2.0 | 3.66E-03 |

|                        |                                                                                                                                                                                                                                                      |      |          |
|------------------------|------------------------------------------------------------------------------------------------------------------------------------------------------------------------------------------------------------------------------------------------------|------|----------|
|                        | cation resistance, and cellular detoxification during exponential growth, PDR5                                                                                                                                                                       |      |          |
| MUP3                   | Low affinity methionine permease, similar to Mup1p, MUP3                                                                                                                                                                                             | 1.9  | 8.15E-04 |
| YOR1                   | Plasma membrane ATP-binding cassette (ABC) transporter, multidrug transporter mediates export of many different organic anions including oligomycin, YOR1                                                                                            | 1.7  | 8.81E-03 |
| ALP1                   | Arginine transporter; expression is normally very low and it is unclear what conditions would induce significant expression, ALP1                                                                                                                    | 1.2  | 3.81E-03 |
| ZRT1                   | High-affinity zinc transporter of the plasma membrane, responsible for the majority of zinc uptake; transcription is induced under low-zinc conditions by the Zap1p transcription factor, ZRT1                                                       | -1.1 | 7.69E-03 |
| PDR12                  | Plasma membrane ATP-binding cassette (ABC) transporter, weak-acid-inducible multidrug transporter required for weak organic acid resistance; induced by sorbate and benzoate and regulated by War1p; mutants exhibit sorbate hypersensitivity, PDR12 | -1.5 | 8.27E-04 |
| <b>Redox processes</b> |                                                                                                                                                                                                                                                      |      |          |
| JLP1                   | Fe(II)-dependent sulfonate/alpha-ketoglutarate dioxygenase, involved in sulfonate catabolism for use as a sulfur source, contains sequence that closely resembles a J domain (typified by the E. coli DnaJ protein), JLP1                            | 6.7  | 1.80E-05 |
| OYE3                   | Widely conserved NADPH oxidoreductase containing flavin mononucleotide (FMN), homologous to Oye2p with slight differences in ligand binding and catalytic properties; may be involved in sterol metabolism, OYE3                                     | 3.6  | 9.43E-05 |
| IDP2                   | Cytosolic NADP-specific isocitrate dehydrogenase, catalyzes oxidation of isocitrate to alpha-ketoglutarate; levels are elevated during growth on non-fermentable carbon sources and reduced during growth on glucose, IDP2                           | 3.1  | 1.51E-04 |
| GPX1                   | Phospholipid hydroperoxide glutathione peroxidase induced by glucose starvation that protects cells from phospholipid hydroperoxides and nonphospholipid peroxides during oxidative stress, GPX1                                                     | 3.0  | 8.70E-03 |
| IRC15                  | Putative S-adenosylmethionine-dependent methyltransferase of the seven beta-strand family; null mutant displays increased levels of spontaneous Rad52 foci, ---                                                                                      | 2.9  | 5.70E-05 |
| NDE2                   | Mitochondrial external NADH dehydrogenase, catalyzes the oxidation of cytosolic NADH; Nde1p and Nde2p are involved in providing the cytosolic NADH to the mitochondrial respiratory chain, NDE2                                                      | 2.7  | 9.11E-06 |
| HMX1                   | ER localized, heme-binding peroxidase involved in the degradation of heme; does not exhibit heme oxygenase activity despite similarity to heme oxygenases; expression                                                                                | 2.5  | 9.76E-03 |

|         |                                                                                                                                                                                                                              |     |          |
|---------|------------------------------------------------------------------------------------------------------------------------------------------------------------------------------------------------------------------------------|-----|----------|
|         | regulated by AFT1, HMX1                                                                                                                                                                                                      |     |          |
| FMO1    | Flavin-containing monooxygenase, localized to the cytoplasmic face of the ER membrane; catalyzes oxidation of biological thiols to maintain the ER redox buffer ratio for correct folding of disulfide-bonded proteins, FMO1 | 2.4 | 1.45E-04 |
| GRE2    | NADPH-dependent methylglyoxal reductase (D-lactaldehyde dehydrogenase); stress induced (osmotic, ionic, oxidative, heat shock and heavy metals); regulated by the HOG pathway, GRE2                                          | 2.2 | 3.38E-03 |
| GTO1    | Omega-class glutathione transferase; induced under oxidative stress; putative peroxisomal localization, GTO1                                                                                                                 | 2.2 | 9.17E-05 |
| CTT1    | Cytosolic catalase T, has a role in protection from oxidative damage by hydrogen peroxide, CTT1                                                                                                                              | 2.2 | 1.98E-04 |
| GND2    | 6-phosphogluconate dehydrogenase (decarboxylating), catalyzes an NADPH regenerating reaction in the pentose phosphate pathway; required for growth on D-glucono-delta-lactone, GND2                                          | 2.1 | 1.28E-04 |
| FRE5    | Putative ferric reductase with similarity to Fre2p; expression induced by low iron levels; the authentic, non-tagged protein is detected in highly purified mitochondria in high-throughput studies, FRE5                    | 2.1 | 9.73E-04 |
| FMP46   | Putative redox protein containing a thioredoxin fold; the authentic, non-tagged protein is detected in highly purified mitochondria in high-throughput studies, FMP46                                                        | 2.0 | 5.29E-03 |
| YHB1    | Nitric oxide oxidoreductase, flavohemoglobin involved in nitric oxide detoxification; plays a role in the oxidative and nitrosative stress responses, YHB1                                                                   | 1.9 | 4.92E-03 |
| OLE1    | Delta(9) fatty acid desaturase, required for monounsaturated fatty acid synthesis and for normal distribution of mitochondria, OLE1                                                                                          | 1.9 | 3.32E-04 |
| MET8    | Bifunctional dehydrogenase and ferrochelataase, involved in the biosynthesis of siroheme, a prosthetic group used by sulfite reductase; required for sulfate assimilation and methionine biosynthesis, MET8                  | 1.9 | 4.47E-04 |
| GDH3    | NADP(+)-dependent glutamate dehydrogenase, synthesizes glutamate from ammonia and alpha-ketoglutarate; rate of alpha-ketoglutarate utilization differs from Gdh1p; expression regulated by nitrogen and carbon sources, GDH3 | 1.8 | 5.97E-04 |
| MXR1    | Peptide methionine sulfoxide reductase, reverses the oxidation of methionine residues; involved in oxidative damage repair, providing resistance to oxidative stress and regulation of lifespan, MXR1                        | 1.8 | 1.94E-03 |
| BDH2    | Putative medium-chain alcohol dehydrogenase with similarity to BDH1; transcription induced by constitutively active PDR1 and PDR3; BDH2 is an essential gene, BDH2                                                           | 1.7 | 3.83E-03 |
| YKL107W | Putative protein of unknown function, ---                                                                                                                                                                                    | 1.6 | 5.03E-   |

|         |                                                                                                                                                                                                                                                        |     |          |
|---------|--------------------------------------------------------------------------------------------------------------------------------------------------------------------------------------------------------------------------------------------------------|-----|----------|
|         |                                                                                                                                                                                                                                                        |     | 04       |
| TRX3    | Mitochondrial thioredoxin, highly conserved oxidoreductase required to maintain the redox homeostasis of the cell, forms the mitochondrial thioredoxin system with Trr2p, redox state is maintained by both Trr2p and Glr1p, TRX3                      | 1.6 | 2.39E-03 |
| HBN1    | Putative protein of unknown function; similar to bacterial nitroreductases; green fluorescent protein (GFP)-fusion protein localizes to the cytoplasm and nucleus, HBN1                                                                                | 1.5 | 2.10E-04 |
| YDL124W | NADPH-dependent alpha-keto amide reductase; reduces aromatic alpha-keto amides, aliphatic alpha-keto esters, and aromatic alpha-keto esters; member of the aldo-keto reductase (AKR) family, ---                                                       | 1.5 | 4.20E-04 |
| ECM4    | Omega class glutathione transferase; not essential; similar to Ygr154cp; green fluorescent protein (GFP)-fusion protein localizes to the cytoplasm, ECM4                                                                                               | 1.4 | 2.94E-04 |
| GUT2    | Mitochondrial glycerol-3-phosphate dehydrogenase; expression is repressed by both glucose and cAMP and derepressed by non-fermentable carbon sources in a Snf1p, Rsf1p, Hap2/3/4/5 complex dependent manner, GUT2                                      | 1.3 | 4.40E-03 |
| MCR1    | Mitochondrial NADH-cytochrome b5 reductase, involved in ergosterol biosynthesis, MCR1                                                                                                                                                                  | 1.3 | 1.58E-03 |
| RPH1    | JmjC domain-containing histone demethylase which can specifically demethylate H3K36 tri- and dimethyl modification states; transcriptional repressor of PHR1; Rph1p phosphorylation during DNA damage is under control of the MEC1-RAD53 pathway, RPH1 | 1.3 | 7.43E-03 |
| AAD6    | Putative aryl-alcohol dehydrogenase with similarity to P. chrysosporium aryl-alcohol dehydrogenase, involved in the oxidative stress response, AAD6                                                                                                    | 1.2 | 7.73E-03 |
| RNR3    | Ribonucleotide-diphosphate reductase (RNR), large subunit; the RNR complex catalyzes the rate-limiting step in dNTP synthesis and is regulated by DNA replication and DNA damage checkpoint pathways via localization of the small subunits, RNR3      | 1.2 | 8.96E-03 |
| GDH2    | NAD(+)-dependent glutamate dehydrogenase, degrades glutamate to ammonia and alpha-ketoglutarate; expression sensitive to nitrogen catabolite repression and intracellular ammonia levels, GDH2                                                         | 1.1 | 1.67E-03 |
| OYE2    | Widely conserved NADPH oxidoreductase containing flavin mononucleotide (FMN), homologous to Oye3p with slight differences in ligand binding and catalytic properties; may be involved in sterol metabolism, OYE2                                       | 1.1 | 4.40E-03 |
| FRE6    | Putative ferric reductase with similarity to Fre2p; expression induced by low iron levels, FRE6                                                                                                                                                        | 1.1 | 7.08E-03 |
| UGA2    | Succinate semialdehyde dehydrogenase involved in the utilization of gamma-aminobutyrate (GABA) as a nitrogen source; part of the 4-aminobutyrate and                                                                                                   | 1.1 | 5.39E-03 |

|                                              |                                                                                                                                                                                                                                                        |     |          |
|----------------------------------------------|--------------------------------------------------------------------------------------------------------------------------------------------------------------------------------------------------------------------------------------------------------|-----|----------|
|                                              | glutamate degradation pathways; localized to the cytoplasm, UGA2                                                                                                                                                                                       |     |          |
| FAS2                                         | Alpha subunit of fatty acid synthetase, which catalyzes the synthesis of long-chain saturated fatty acids; contains beta-ketoacyl reductase and beta-ketoacyl synthase activities; phosphorylated, FAS2                                                | 1.1 | 6.48E-03 |
| PRX1                                         | Mitochondrial peroxiredoxin (1-Cys Prx) with thioredoxin peroxidase activity, has a role in reduction of hydroperoxides; induced during respiratory growth and under conditions of oxidative stress; phosphorylated, PRX1                              | 1.1 | 2.76E-03 |
| GTT1                                         | ER associated glutathione S-transferase capable of homodimerization; expression induced during the diauxic shift and throughout stationary phase; functional overlap with Gtt2p, Grx1p, and Grx2p, GTT1                                                | 1.0 | 9.16E-03 |
| HTD2                                         | Mitochondrial 3-hydroxyacyl-thioester dehydratase involved in fatty acid biosynthesis, required for respiratory growth and for normal mitochondrial morphology, HTD2                                                                                   | 1.0 | 3.55E-03 |
| LOT6                                         | FMN-dependent NAD(P)H:quinone reductase that may be involved in quinone detoxification; gene expression increases in cultures shifted to a lower temperature, LOT6                                                                                     | 0.9 | 5.86E-03 |
| <b>Biosynthesis of secondary metabolites</b> |                                                                                                                                                                                                                                                        |     |          |
| FBP1                                         | Fructose-1,6-bisphosphatase, key regulatory enzyme in the gluconeogenesis pathway, required for glucose metabolism, FBP1                                                                                                                               | 5.5 | 7.81E-05 |
| PDC6                                         | Minor isoform of pyruvate decarboxylase, decarboxylates pyruvate to acetaldehyde, involved in amino acid catabolism; transcription is glucose- and ethanol-dependent, and is strongly induced during sulfur limitation, PDC6                           | 4.3 | 3.70E-04 |
| INO1                                         | Inositol 1-phosphate synthase, involved in synthesis of inositol phosphates and inositol-containing phospholipids; transcription is coregulated with other phospholipid biosynthetic genes by Ino2p and Ino4p, which bind the UASINO DNA element, INO1 | 4.1 | 7.39E-07 |
| AGX1                                         | Alanine:glyoxylate aminotransferase (AGT), catalyzes the synthesis of glycine from glyoxylate, which is one of three pathways for glycine biosynthesis in yeast; has similarity to mammalian and plant alanine:glyoxylate aminotransferases, AGX1      | 3.1 | 8.96E-06 |
| IDP2                                         | Cytosolic NADP-specific isocitrate dehydrogenase, catalyzes oxidation of isocitrate to alpha-ketoglutarate; levels are elevated during growth on non-fermentable carbon sources and reduced during growth on glucose, IDP2                             | 3.1 | 1.51E-04 |
| IRC15                                        | Putative S-adenosylmethionine-dependent methyltransferase of the seven beta-strand family; null mutant displays increased levels of spontaneous Rad52                                                                                                  | 2.9 | 5.70E-05 |

|                                  |                                                                                                                                                                                                                                                        |     |          |
|----------------------------------|--------------------------------------------------------------------------------------------------------------------------------------------------------------------------------------------------------------------------------------------------------|-----|----------|
|                                  | foci, ---                                                                                                                                                                                                                                              |     |          |
| POT1                             | 3-ketoacyl-CoA thiolase with broad chain length specificity, cleaves 3-ketoacyl-CoA into acyl-CoA and acetyl-CoA during beta-oxidation of fatty acids, POT1                                                                                            | 2.8 | 5.84E-04 |
| CTT1                             | Cytosolic catalase T, has a role in protection from oxidative damage by hydrogen peroxide, CTT1                                                                                                                                                        | 2.2 | 1.98E-04 |
| GND2                             | 6-phosphogluconate dehydrogenase (decarboxylating), catalyzes an NADPH regenerating reaction in the pentose phosphate pathway; required for growth on D-glucono-delta-lactone, GND2                                                                    | 2.1 | 1.28E-04 |
| MET8                             | Bifunctional dehydrogenase and ferrochelatase, involved in the biosynthesis of siroheme, a prosthetic group used by sulfite reductase; required for sulfate assimilation and methionine biosynthesis, MET8                                             | 1.9 | 4.47E-04 |
| GAL3                             | Transcriptional regulator involved in activation of the GAL genes in response to galactose; forms a complex with Gal80p to relieve Gal80p inhibition of Gal4p; binds galactose and ATP but does not have galactokinase activity, GAL3                  | 1.3 | 2.31E-03 |
| MCR1                             | Mitochondrial NADH-cytochrome b5 reductase, involved in ergosterol biosynthesis, MCR1                                                                                                                                                                  | 1.3 | 1.58E-03 |
| ACS1                             | Acetyl-coA synthetase isoform which, along with Acs2p, is the nuclear source of acetyl-coA for histone acetylation; expressed during growth on nonfermentable carbon sources and under aerobic conditions, ACS1                                        | 1.2 | 2.15E-03 |
| SDH4                             | Membrane anchor subunit of succinate dehydrogenase (Sdh1p, Sdh2p, Sdh3p, Sdh4p), which couples the oxidation of succinate to the transfer of electrons to ubiquinone, SDH4                                                                             | 1.1 | 4.66E-03 |
| YNK1                             | Nucleoside diphosphate kinase, catalyzes the transfer of gamma phosphates from nucleoside triphosphates, usually ATP, to nucleoside diphosphates by a mechanism that involves formation of an autophosphorylated enzyme intermediate, YNK1             | 1.1 | 4.62E-03 |
| SAM2                             | S-adenosylmethionine synthetase, catalyzes transfer of the adenosyl group of ATP to the sulfur atom of methionine; one of two differentially regulated isozymes (Sam1p and Sam2p), SAM2                                                                | 0.9 | 8.18E-03 |
| <b>Small metabolic processes</b> |                                                                                                                                                                                                                                                        |     |          |
| PDC6                             | Minor isoform of pyruvate decarboxylase, decarboxylates pyruvate to acetaldehyde, involved in amino acid catabolism; transcription is glucose- and ethanol-dependent, and is strongly induced during sulfur limitation, PDC6                           | 4.3 | 3.70E-04 |
| INO1                             | Inositol 1-phosphate synthase, involved in synthesis of inositol phosphates and inositol-containing phospholipids; transcription is coregulated with other phospholipid biosynthetic genes by Ino2p and Ino4p, which bind the UASINO DNA element, INO1 | 4.1 | 7.39E-07 |

|       |                                                                                                                                                                                                                                                   |     |          |
|-------|---------------------------------------------------------------------------------------------------------------------------------------------------------------------------------------------------------------------------------------------------|-----|----------|
| YGP1  | Cell wall-related secretory glycoprotein; induced by nutrient deprivation-associated growth arrest and upon entry into stationary phase; may be involved in adaptation prior to stationary phase entry; has similarity to Sps100p, YGP1           | 4.0 | 1.13E-07 |
| PDR15 | Plasma membrane ATP binding cassette (ABC) transporter, multidrug transporter and general stress response factor implicated in cellular detoxification; regulated by Pdr1p, Pdr3p and Pdr8p; promoter contains a PDR responsive element, PDR15    | 3.2 | 4.08E-04 |
| AGX1  | Alanine:glyoxylate aminotransferase (AGT), catalyzes the synthesis of glycine from glyoxylate, which is one of three pathways for glycine biosynthesis in yeast; has similarity to mammalian and plant alanine:glyoxylate aminotransferases, AGX1 | 3.1 | 8.96E-06 |
| IDP2  | Cytosolic NADP-specific isocitrate dehydrogenase, catalyzes oxidation of isocitrate to alpha-ketoglutarate; levels are elevated during growth on non-fermentable carbon sources and reduced during growth on glucose, IDP2                        | 3.1 | 1.51E-04 |
| POT1  | 3-ketoacyl-CoA thiolase with broad chain length specificity, cleaves 3-ketoacyl-CoA into acyl-CoA and acetyl-CoA during beta-oxidation of fatty acids, POT1                                                                                       | 2.8 | 5.84E-04 |
| URA10 | One of two orotate phosphoribosyltransferase isozymes (see also URA5) that catalyze the fifth enzymatic step in the de novo biosynthesis of pyrimidines, converting orotate into orotidine-5'-phosphate, URA10                                    | 2.8 | 2.39E-03 |
| NDE2  | Mitochondrial external NADH dehydrogenase, catalyzes the oxidation of cytosolic NADH; Nde1p and Nde2p are involved in providing the cytosolic NADH to the mitochondrial respiratory chain, NDE2                                                   | 2.7 | 9.11E-06 |
| GRE2  | NADPH-dependent methylglyoxal reductase (D-lactaldehyde dehydrogenase); stress induced (osmotic, ionic, oxidative, heat shock and heavy metals); regulated by the HOG pathway, GRE2                                                               | 2.2 | 3.38E-03 |
| GTO1  | Omega-class glutathione transferase; induced under oxidative stress; putative peroxisomal localization, GTO1                                                                                                                                      | 2.2 | 9.17E-05 |
| GND2  | 6-phosphogluconate dehydrogenase (decarboxylating), catalyzes an NADPH regenerating reaction in the pentose phosphate pathway; required for growth on D-glucono-delta-lactone, GND2                                                               | 2.1 | 1.28E-04 |
| MHT1  | S-methylmethionine-homocysteine methyltransferase, functions along with Sam4p in the conversion of S-adenosylmethionine (AdoMet) to methionine to control the methionine/AdoMet ratio, MHT1                                                       | 2.0 | 8.18E-04 |
| PDR5  | Plasma membrane ATP-binding cassette (ABC) transporter, short-lived multidrug transporter actively regulated by Pdr1p; also involved in steroid transport, cation resistance, and cellular detoxification during exponential growth, PDR5         | 2.0 | 3.66E-03 |

|         |                                                                                                                                                                                                                                                       |     |          |
|---------|-------------------------------------------------------------------------------------------------------------------------------------------------------------------------------------------------------------------------------------------------------|-----|----------|
| OLE1    | Delta(9) fatty acid desaturase, required for monounsaturated fatty acid synthesis and for normal distribution of mitochondria, OLE1                                                                                                                   | 1.9 | 3.32E-04 |
| MET8    | Bifunctional dehydrogenase and ferrochelatase, involved in the biosynthesis of siroheme, a prosthetic group used by sulfite reductase; required for sulfate assimilation and methionine biosynthesis, MET8                                            | 1.9 | 4.47E-04 |
| GDH3    | NADP(+)-dependent glutamate dehydrogenase, synthesizes glutamate from ammonia and alpha-ketoglutarate; rate of alpha-ketoglutarate utilization differs from Gdh1p; expression regulated by nitrogen and carbon sources, GDH3                          | 1.8 | 5.97E-04 |
| CAT2    | Carnitine acetyl-CoA transferase present in both mitochondria and peroxisomes, transfers activated acetyl groups to carnitine to form acetylcarnitine which can be shuttled across membranes, CAT2                                                    | 1.7 | 1.13E-04 |
| YOR1    | Plasma membrane ATP-binding cassette (ABC) transporter, multidrug transporter mediates export of many different organic anions including oligomycin, YOR1                                                                                             | 1.7 | 8.81E-03 |
| MET32   | Zinc-finger DNA-binding protein, involved in transcriptional regulation of the methionine biosynthetic genes, similar to Met31p, MET32                                                                                                                | 1.6 | 4.12E-04 |
| TRX3    | Mitochondrial thioredoxin, highly conserved oxidoreductase required to maintain the redox homeostasis of the cell, forms the mitochondrial thioredoxin system with Trr2p, redox state is maintained by both Trr2p and Glr1p, TRX3                     | 1.6 | 2.39E-03 |
| THI4    | Thiazole synthase, catalyzes formation of the thiazole moiety of thiamin pyrophosphate; required for thiamine biosynthesis and for mitochondrial genome stability, THI4                                                                               | 1.6 | 1.27E-04 |
| MET28   | Transcriptional activator in the Cbf1p-Met4p-Met28p complex, participates in the regulation of sulfur metabolism, MET28                                                                                                                               | 1.6 | 1.74E-04 |
| UBC8    | Ubiquitin-conjugating enzyme that negatively regulates gluconeogenesis by mediating the glucose-induced ubiquitination of fructose-1,6-bisphosphatase (FBPase); cytoplasmic enzyme that catalyzes the ubiquitination of histones in vitro, UBC8       | 1.6 | 4.67E-03 |
| MET30   | F-box protein containing five copies of the WD40 motif, controls cell cycle function, sulfur metabolism, and methionine biosynthesis as part of the ubiquitin ligase complex; interacts with and regulates Met4p, localizes within the nucleus, MET30 | 1.6 | 2.18E-03 |
| YKL151C | Putative protein of unknown function; green fluorescent protein (GFP)-fusion protein localizes to the cytoplasm, --                                                                                                                                   | 1.6 | 2.19E-03 |
| DAPI    | Heme-binding protein involved in regulation of cytochrome P450 protein Erg11p; damage response                                                                                                                                                        | 1.5 | 8.74E-03 |



|         |                                                                                                                                                                                                                                                        |     |          |
|---------|--------------------------------------------------------------------------------------------------------------------------------------------------------------------------------------------------------------------------------------------------------|-----|----------|
|         | protein, related to mammalian membrane progesterone receptors; mutations lead to defects in telomeres, mitochondria, and sterol synthesis, DAP1                                                                                                        |     |          |
| MET2    | L-homoserine-O-acetyltransferase, catalyzes the conversion of homoserine to O-acetyl homoserine which is the first step of the methionine biosynthetic pathway, MET2                                                                                   | 1.5 | 1.79E-04 |
| YDL124W | NADPH-dependent alpha-keto amide reductase; reduces aromatic alpha-keto amides, aliphatic alpha-keto esters, and aromatic alpha-keto esters; member of the aldo-keto reductase (AKR) family, ---                                                       | 1.5 | 4.20E-04 |
| ECM4    | Omega class glutathione transferase; not essential; similar to Ygr154cp; green fluorescent protein (GFP)-fusion protein localizes to the cytoplasm, ECM4                                                                                               | 1.4 | 2.94E-04 |
| GSP2    | GTP binding protein (mammalian Ranp homolog) involved in the maintenance of nuclear organization, RNA processing and transport; interacts with Kap121p, Kap123p and Pdr6p (karyophilin betas); Gsp1p homolog that is not required for viability, GSP2  | 1.4 | 6.29E-04 |
| STF1    | Protein involved in regulation of the mitochondrial F1F0-ATP synthase; Stf1p and Stf2p act as stabilizing factors that enhance inhibitory action of the Inh1p protein, STF1                                                                            | 1.3 | 1.16E-03 |
| GUT2    | Mitochondrial glycerol-3-phosphate dehydrogenase; expression is repressed by both glucose and cAMP and derepressed by non-fermentable carbon sources in a Snf1p, Rsf1p, Hap2/3/4/5 complex dependent manner, GUT2                                      | 1.3 | 4.40E-03 |
| GSH1    | Gamma glutamylcysteine synthetase catalyzes the first step in glutathione (GSH) biosynthesis; expression induced by oxidants, cadmium, and mercury, GSH1                                                                                               | 1.3 | 5.85E-04 |
| CKI1    | Choline kinase, catalyzing the first step in phosphatidylcholine synthesis via the CDP-choline (Kennedy pathway); exhibits some ethanolamine kinase activity contributing to phosphatidylethanolamine synthesis via the CDP-ethanolamine pathway, CKI1 | 1.3 | 3.23E-03 |
| MCR1    | Mitochondrial NADH-cytochrome b5 reductase, involved in ergosterol biosynthesis, MCR1                                                                                                                                                                  | 1.3 | 1.58E-03 |
| GTT2    | Glutathione S-transferase capable of homodimerization; functional overlap with Gtt2p, Grx1p, and Grx2p, GTT2                                                                                                                                           | 1.2 | 1.15E-03 |
| VHS3    | Functionally redundant (see also SIS2) inhibitory subunit of Ppz1p, a PP1c-related ser/thr protein phosphatase Z isoform; synthetically lethal with sis2; putative phosphopantothenoylcysteine decarboxylase involved in coenzyme A biosynthesis, VHS3 | 1.2 | 3.03E-03 |
| CAT8    | Zinc cluster transcriptional activator necessary for derepression of a variety of genes under non-fermentative growth conditions, active after diauxic shift, binds carbon source responsive elements, CAT8                                            | 1.2 | 7.90E-03 |
| PCA1    | Cadmium transporting P-type ATPase; may also have a role in copper and iron homeostasis; S288C and most                                                                                                                                                | 1.2 | 7.40E-03 |

|         |                                                                                                                                                                                                                                                   |     |          |
|---------|---------------------------------------------------------------------------------------------------------------------------------------------------------------------------------------------------------------------------------------------------|-----|----------|
|         | other lab strains contain a G970R mutation which eliminates normal cadmium transport function, PCA1                                                                                                                                               |     |          |
| GDE1    | Glycerophosphocholine (GroPCho) phosphodiesterase; hydrolyzes GroPCho to choline and glycerolphosphate, for use as a phosphate source and as a precursor for phosphocholine synthesis; may interact with ribosomes, GDE1                          | 1.2 | 8.96E-03 |
| RNR3    | Ribonucleotide-diphosphate reductase (RNR), large subunit; the RNR complex catalyzes the rate-limiting step in dNTP synthesis and is regulated by DNA replication and DNA damage checkpoint pathways via localization of the small subunits, RNR3 | 1.2 | 8.96E-03 |
| YNL200C | Putative protein of unknown function; the authentic, non-tagged protein is detected in highly purified mitochondria in high-throughput studies, ---                                                                                               | 1.2 | 1.16E-03 |
| ACS1    | Acetyl-coA synthetase isoform which, along with Acs2p, is the nuclear source of acetyl-coA for histone acetylation; expressed during growth on nonfermentable carbon sources and under aerobic conditions, ACS1                                   | 1.2 | 2.15E-03 |
| CHO1    | Phosphatidylserine synthase, functions in phospholipid biosynthesis; catalyzes the reaction CDP-diaclyglycerol + L-serine = CMP + L-1-phosphatidylserine, transcriptionally repressed by myo-inositol and choline, CHO1                           | 1.1 | 1.53E-03 |
| CHO2    | Phosphatidylethanolamine methyltransferase (PEMT), catalyzes the first step in the conversion of phosphatidylethanolamine to phosphatidylcholine during the methylation pathway of phosphatidylcholine biosynthesis, CHO2                         | 1.1 | 3.97E-03 |
| MSB3    | GTPase-activating protein for Sec4p and several other Rab GTPases, regulates exocytosis via its action on Sec4p, also required for proper actin organization; similar to Msb4p; both Msb3p and Msb4p localize to sites of polarized growth, MSB3  | 1.1 | 2.29E-03 |
| GDH2    | NAD(+)-dependent glutamate dehydrogenase, degrades glutamate to ammonia and alpha-ketoglutarate; expression sensitive to nitrogen catabolite repression and intracellular ammonia levels, GDH2                                                    | 1.1 | 1.67E-03 |
| UGA2    | Succinate semialdehyde dehydrogenase involved in the utilization of gamma-aminobutyrate (GABA) as a nitrogen source; part of the 4-aminobutyrate and glutamate degradation pathways; localized to the cytoplasm, UGA2                             | 1.1 | 5.39E-03 |
| FAS2    | Alpha subunit of fatty acid synthetase, which catalyzes the synthesis of long-chain saturated fatty acids; contains beta-ketoacyl reductase and beta-ketoacyl synthase activities; phosphorylated, FAS2                                           | 1.1 | 6.48E-03 |
| YNK1    | Nucleoside diphosphate kinase, catalyzes the transfer of gamma phosphates from nucleoside triphosphates, usually ATP, to nucleoside diphosphates by a mechanism that                                                                              | 1.1 | 4.62E-03 |

|                                 |                                                                                                                                                                                                                                                     |     |          |
|---------------------------------|-----------------------------------------------------------------------------------------------------------------------------------------------------------------------------------------------------------------------------------------------------|-----|----------|
|                                 | involves formation of an autophosphorylated enzyme intermediate, YNK1                                                                                                                                                                               |     |          |
| MET3                            | ATP sulfurylase, catalyzes the primary step of intracellular sulfate activation, essential for assimilatory reduction of sulfate to sulfide, involved in methionine metabolism, MET3                                                                | 1.1 | 9.38E-03 |
| ROM1                            | GDP/GTP exchange protein (GEP) for Rho1p; mutations are synthetically lethal with mutations in rom2, which also encodes a GEP, ROM1                                                                                                                 | 1.0 | 5.61E-03 |
| GTT1                            | ER associated glutathione S-transferase capable of homodimerization; expression induced during the diauxic shift and throughout stationary phase; functional overlap with Gtt2p, Grx1p, and Grx2p, GTT1                                             | 1.0 | 9.16E-03 |
| HTD2                            | Mitochondrial 3-hydroxyacyl-thioester dehydratase involved in fatty acid biosynthesis, required for respiratory growth and for normal mitochondrial morphology, HTD2                                                                                | 1.0 | 3.55E-03 |
| OPI3                            | Phospholipid methyltransferase (methylene-fatty-acyl-phospholipid synthase), catalyzes the last two steps in phosphatidylcholine biosynthesis, OPI3                                                                                                 | 1.0 | 6.83E-03 |
| EHT1                            | Acyl-coenzymeA:ethanol O-acyltransferase that plays a minor role in medium-chain fatty acid ethyl ester biosynthesis; contains esterase activity; localizes to lipid particles and the mitochondrial outer membrane, EHT1                           | 0.9 | 6.13E-03 |
| INH1                            | Protein that inhibits ATP hydrolysis by the F1F0-ATP synthase, inhibitory function is enhanced by stabilizing proteins Stf1p and Stf2p; has similarity to Stf1p and both Inh1p and Stf1p exhibit the potential to form coiled-coil structures, INH1 | 0.9 | 8.93E-03 |
| SAM2                            | S-adenosylmethionine synthetase, catalyzes transfer of the adenosyl group of ATP to the sulfur atom of methionine; one of two differentially regulated isozymes (Sam1p and Sam2p), SAM2                                                             | 0.9 | 8.18E-03 |
| <b>Stress</b>                   |                                                                                                                                                                                                                                                     |     |          |
| <i>Multiple stress response</i> |                                                                                                                                                                                                                                                     |     |          |
| SPI1                            | GPI-anchored cell wall protein involved in weak acid resistance; basal expression requires Msn2p/Msn4p; expression is induced under conditions of stress and during the diauxic shift; similar to Sed1p, SPI1                                       | 4.7 | 8.17E-04 |
| PDR15                           | Plasma membrane ATP binding cassette (ABC) transporter, multidrug transporter and general stress response factor implicated in cellular detoxification; regulated by Pdr1p, Pdr3p and Pdr8p; promoter contains a PDR responsive element, PDR15      | 3.2 | 4.08E-04 |
| DDR2                            | Multistress response protein, expression is activated by a variety of xenobiotic agents and environmental or physiological stresses, DDR2                                                                                                           | 2.7 | 1.11E-05 |
| GRE2                            | NADPH-dependent methylglyoxal reductase (D-lactaldehyde dehydrogenase); stress induced (osmotic,                                                                                                                                                    | 2.2 | 3.38E-03 |

|                          |                                                                                                                                                                                                                                                                     |     |          |
|--------------------------|---------------------------------------------------------------------------------------------------------------------------------------------------------------------------------------------------------------------------------------------------------------------|-----|----------|
|                          | ionic, oxidative, heat shock and heavy metals); regulated by the HOG pathway, GRE2                                                                                                                                                                                  |     |          |
| CTT1                     | Cytosolic catalase T, has a role in protection from oxidative damage by hydrogen peroxide,                                                                                                                                                                          | 2.2 | 1.98E-04 |
| SRL3                     | Cytoplasmic protein that, when overexpressed, suppresses the lethality of a rad53 null mutation; potential Cdc28p substrate                                                                                                                                         | 2.0 | 0.003542 |
| DCS2                     | Non-essential, stress induced regulatory protein containing a HIT (histidine triad) motif; modulates m7G-oligoribonucleotide metabolism; inhibits Dcs1p; regulated by Msn2p, Msn4p, and the Ras-cAMP-cAPK signaling pathway, similar to Dcs1p., DCS2                | 1.9 | 6.80E-04 |
| FRT2                     | Tail-anchored endoplasmic reticulum membrane protein, interacts with homolog Frt1p but is not a substrate of calcineurin (unlike Frt1p), promotes growth in conditions of high Na <sup>+</sup> , alkaline pH, or cell wall stress; potential Cdc28p substrate, FRT2 | 1.7 | 3.36E-03 |
| RPN4                     | Transcription factor that stimulates expression of proteasome genes; Rpn4p levels are in turn regulated by the 26S proteasome in a negative feedback control mechanism; RPN4 is transcriptionally regulated by various stress responses, RPN4                       | 1.5 | 8.18E-03 |
| MBR1                     | Protein involved in mitochondrial functions and stress response; overexpression suppresses growth defects of hap2, hap3, and hap4 mutants, MBR1                                                                                                                     | 1.5 | 7.49E-03 |
| UBI4                     | Ubiquitin, becomes conjugated to proteins, marking them for selective degradation via the ubiquitin-26S proteasome system; essential for the cellular stress response; encoded as a polyubiquitin precursor comprised of 5 head-to-tail repeats, UBI4               | 1.2 | 1.98E-03 |
| HSP150                   | O-mannosylated heat shock protein that is secreted and covalently attached to the cell wall via beta-1,3-glucan and disulfide bridges; required for cell wall stability; induced by heat shock, oxidative stress, and nitrogen limitation, HSP150                   | 1.0 | 6.70E-03 |
| NTH1                     | Neutral trehalase, degrades trehalose; required for thermotolerance and may mediate resistance to other cellular stresses; may be phosphorylated by Cdc28p, NTH1                                                                                                    | 1.0 | 5.36E-03 |
| <i>Osmolarity stress</i> |                                                                                                                                                                                                                                                                     |     |          |
| SIP18                    | Protein of unknown function whose expression is induced by osmotic stress, SIP18                                                                                                                                                                                    | 5.4 | 5.69E-08 |
| STL1                     | Glycerol proton symporter of the plasma membrane, subject to glucose-induced inactivation, strongly but transiently induced when cells are subjected to osmotic shock, STL1                                                                                         | 3.9 | 2.35E-03 |
| PAI3                     | Cytoplasmic proteinase A (Pep4p) inhibitor, dependent on Pbs2p and Hog1p protein kinases for osmotic induction; intrinsically unstructured, N-terminal half                                                                                                         | 3.7 | 5.86E-06 |

|                         |                                                                                                                                                                                                                                                         |     |          |
|-------------------------|---------------------------------------------------------------------------------------------------------------------------------------------------------------------------------------------------------------------------------------------------------|-----|----------|
|                         | becomes ordered in the active site of proteinase A upon contact, PAI3                                                                                                                                                                                   |     |          |
| SMP1                    | Putative transcription factor involved in regulating the response to osmotic stress; member of the MADS-box family of transcription factors, SMP1                                                                                                       | 1.7 | 2.70E-03 |
| GPH1                    | Non-essential glycogen phosphorylase required for the mobilization of glycogen, activity is regulated by cyclic AMP-mediated phosphorylation, expression is regulated by stress-response elements and by the HOG MAP kinase pathway, GPH1               | 1.4 | 2.25E-03 |
| SSK22                   | MAP kinase kinase kinase of the HOG1 mitogen-activated signaling pathway; functionally redundant with, and homologous to, Ssk2p; interacts with and is activated by Ssk1p; phosphorylates Pbs2p, SSK22                                                  | 1.2 | 5.15E-03 |
| <i>Heat shock</i>       |                                                                                                                                                                                                                                                         |     |          |
| HSP26                   | Small heat shock protein (sHSP) with chaperone activity; forms hollow, sphere-shaped oligomers that suppress unfolded proteins aggregation; oligomer activation requires a heat-induced conformational change; not expressed in unstressed cells, HSP26 | 4.4 | 2.95E-07 |
| GAC1                    | Regulatory subunit for Glc7p type-1 protein phosphatase (PP1), tethers Glc7p to Gsy2p glycogen synthase, binds Hsf1p heat shock transcription factor, required for induction of some HSF-regulated genes under heat shock, GAC1                         | 2.2 | 9.99E-05 |
| TIP1                    | Major cell wall mannoprotein with possible lipase activity; transcription is induced by heat- and cold-shock; member of the Srp1p/Tip1p family of serine-alanine-rich proteins, TIP1                                                                    | 2.1 | 1.44E-04 |
| HSP12                   | Plasma membrane localized protein that protects membranes from desiccation; induced by heat shock, oxidative stress, osmostress, stationary phase entry, glucose depletion, oleate and alcohol; regulated by the HOG and Ras-Pka pathways, HSP12        | 1.9 | 5.34E-04 |
| UBC5                    | Ubiquitin-conjugating enzyme that mediates selective degradation of short-lived and abnormal proteins, central component of the cellular stress response; expression is heat inducible, UBC5                                                            | 1.3 | 4.99E-04 |
| <i>Oxidative stress</i> |                                                                                                                                                                                                                                                         |     |          |
| OYE3                    | Widely conserved NADPH oxidoreductase containing flavin mononucleotide (FMN), homologous to Oye2p with slight differences in ligand binding and catalytic properties; may be involved in sterol metabolism, OYE3                                        | 3.6 | 9.43E-05 |
| GPX1                    | Phospholipid hydroperoxide glutathione peroxidase induced by glucose starvation that protects cells from phospholipid hydroperoxides and nonphospholipid peroxides during oxidative stress, GPX1                                                        | 3.0 | 8.70E-03 |
| GTO1                    | Omega-class glutathione transferase; induced under oxidative stress; putative peroxisomal localization, GTO1                                                                                                                                            | 2.2 | 9.17E-05 |

|                                            |                                                                                                                                                                                                                                                  |     |          |
|--------------------------------------------|--------------------------------------------------------------------------------------------------------------------------------------------------------------------------------------------------------------------------------------------------|-----|----------|
| CTT1                                       | Cytosolic catalase T, has a role in protection from oxidative damage by hydrogen peroxide,                                                                                                                                                       | 2.2 | 1.98E-04 |
| YHB1                                       | Nitric oxide oxidoreductase, flavohemoglobin involved in nitric oxide detoxification; plays a role in the oxidative and nitrosative stress responses, YHB1                                                                                       | 1.9 | 4.92E-03 |
| MXR1                                       | Peptide methionine sulfoxide reductase, reverses the oxidation of methionine residues; involved in oxidative damage repair, providing resistance to oxidative stress and regulation of lifespan, MXR1                                            | 1.8 | 1.94E-03 |
| gsh1                                       | Gamma glutamylcysteine synthetase catalyzes the first step in glutathione (GSH) biosynthesis; expression induced by oxidants, cadmium, and mercury, GSH1                                                                                         | 1.3 | 5.85E-04 |
| GTT2                                       | Glutathione S-transferase capable of homodimerization; functional overlap with Gtt2p, Grx1p, and Grx2p, GTT2                                                                                                                                     | 1.2 | 1.15E-03 |
| AAD6                                       | Putative aryl-alcohol dehydrogenase with similarity to P. chrysosporium aryl-alcohol dehydrogenase, involved in the oxidative stress response, AAD6                                                                                              | 1.2 | 7.73E-03 |
| PRX1                                       | Mitochondrial peroxiredoxin (1-Cys Prx) with thioredoxin peroxidase activity, has a role in reduction of hydroperoxides; induced during respiratory growth and under conditions of oxidative stress; phosphorylated, PRX1                        | 1.1 | 2.76E-03 |
| YAP5                                       | Basic leucine zipper (bZIP) transcription factor                                                                                                                                                                                                 | 1.0 | 0.00598  |
| GTT1                                       | ER associated glutathione S-transferase capable of homodimerization; expression induced during the diauxic shift and throughout stationary phase; functional overlap with Gtt2p, Grx1p, and Grx2p, GTT1                                          | 1.0 | 9.16E-03 |
| <b>Cell wall integrity and PKC-pathway</b> |                                                                                                                                                                                                                                                  |     |          |
| PIR3                                       | O-glycosylated covalently-bound cell wall protein required for cell wall stability; expression is cell cycle regulated, peaking in M/G1 and also subject to regulation by the cell integrity pathway                                             | 5.0 | 9.39E-07 |
| KDX1(MLP1)                                 | Protein kinase implicated in the Slr2p mitogen-activated (MAP) kinase signaling pathway; associates with Rlm1p, ---                                                                                                                              | 2.1 | 1.38E-03 |
| BAG7                                       | Rho GTPase activating protein (RhoGAP), stimulates the intrinsic GTPase activity of Rho1p, which plays a role in actin cytoskeleton organization and control of cell wall synthesis; structurally and functionally related to Sac7p              | 2.0 | 0.43253  |
| HSP12                                      | Plasma membrane localized protein that protects membranes from desiccation; induced by heat shock, oxidative stress, osmostress, stationary phase entry, glucose depletion, oleate and alcohol; regulated by the HOG and Ras-Pka pathways, HSP12 | 1.9 | 5.34E-04 |
| DCS2                                       | Non-essential, stress induced regulatory protein containing a HIT (histidine triad) motif; modulates m7G-oligoribonucleotide metabolism; inhibits Dcs1p; regulated by Msn2p, Msn4p, and the Ras-cAMP-cAPK signaling pathway, similar to Dcs1p.   | 1.9 | 6.80E-04 |

|      |                                                                                                                                                                                                                                                        |     |          |
|------|--------------------------------------------------------------------------------------------------------------------------------------------------------------------------------------------------------------------------------------------------------|-----|----------|
| AFR1 | Alpha-factor pheromone receptor regulator, negatively regulates pheromone receptor signaling; required for normal mating projection (shmoo) formation; required for Spa2p to recruit Mpk1p to shmoo tip during mating; interacts with Cdc12p, AFR1     | 1.9 | 1.81E-04 |
| SLT2 | Serine/threonine MAP kinase involved in regulating the maintenance of cell wall integrity and progression through the cell cycle; regulated by the PKC1-mediated signaling pathway                                                                     | 1.9 | 0.004729 |
| PST1 | Cell wall protein that contains a putative GPI-attachment site; secreted by regenerating protoplasts; up-regulated by activation of the cell integrity pathway, as mediated by Rlm1p; upregulated by cell wall damage via disruption of FKS1           | 1.9 | 0.004729 |
| GSC2 | Catalytic subunit of 1,3-beta-glucan synthase, involved in formation of the inner layer of the spore wall; activity positively regulated by Rho1p and negatively by Smk1p; has similarity to an alternate catalytic subunit, Fks1p (Gsc1p), GSC2       | 1.6 | 1.04E-03 |
| RLM1 | MADS-box transcription factor, component of the protein kinase C-mediated MAP kinase pathway involved in the maintenance of cell integrity; phosphorylated and activated by the MAP-kinase Slt2p, RLM1                                                 | 1.2 | 1.44E-03 |
| VHS3 | Functionally redundant (see also SIS2) inhibitory subunit of Ppz1p, a PP1c-related ser/thr protein phosphatase Z isoform; synthetically lethal with sis2; putative phosphopantothenoyleysteine decarboxylase involved in coenzyme A biosynthesis, VHS3 | 1.2 | 3.03E-03 |
| MTL1 | Protein with both structural and functional similarity to Mid2p, which is a plasma membrane sensor required for cell integrity signaling during pheromone-induced morphogenesis; suppresses <i>rgd1</i> null mutations                                 | 1.2 | 0.503124 |
| ROM1 | GDP/GTP exchange protein (GEP) for Rho1p; mutations are synthetically lethal with mutations in <i>rom2</i> , which also encodes a GEP, ROM1                                                                                                            | 1.0 | 5.61E-03 |
| SDP1 | Stress-inducible dual-specificity MAP kinase phosphatase, negatively regulates Slt2p MAP kinase by direct dephosphorylation, diffuse localization under normal conditions shifts to punctate localization after heat shock                             | 1.0 | 0.695198 |
| PTP2 | Phosphotyrosine-specific protein phosphatase involved in the inactivation of mitogen-activated protein kinase (MAPK) during osmolarity sensing; dephosphorylates Hog1p MAPK and regulates its localization; localized to the nucleus,                  | 1.0 | 0.027224 |
| SLT2 | Serine/threonine MAP kinase involved in regulating the maintenance of cell wall integrity and progression through the cell cycle; regulated by the PKC1-mediated signaling pathway                                                                     | 0.9 | 0.057308 |
| BCK2 | Protein rich in serine and threonine residues involved in                                                                                                                                                                                              | 0.8 | 0.03723  |

|      |                                                                                                                                                                                                                                                                       |     |              |
|------|-----------------------------------------------------------------------------------------------------------------------------------------------------------------------------------------------------------------------------------------------------------------------|-----|--------------|
|      | protein kinase C signaling pathway, which controls cell integrity; overproduction suppresses <i>pkc1</i> mutations                                                                                                                                                    |     | 1            |
| WSC3 | Partially redundant sensor-transducer of the stress-activated PKC1-MPK1 signaling pathway involved in maintenance of cell wall integrity; involved in the response to heat shock and other stressors; regulates 1,3-beta-glucan synthesis                             | 0.7 | 0.11659<br>8 |
| PRM5 | Pheromone-regulated protein, predicted to have 1 transmembrane segment; induced during cell integrity signaling                                                                                                                                                       | 0.7 | 1            |
| PKH2 | Serine/threonine protein kinase involved in sphingolipid-mediated signaling pathway that controls endocytosis; activates <i>Ypk1p</i> and <i>Ykr2p</i> , components of signaling cascade required for maintenance of cell wall integrity; redundant with <i>Pkh1p</i> | 0.6 | 0.60056<br>9 |
| PKH3 | Protein kinase with similarity to mammalian phosphoinositide-dependent kinase 1 (PDK1) and yeast <i>Pkh1p</i> and <i>Pkh2p</i> , two redundant upstream activators of <i>Pkc1p</i> ; identified as a multicopy suppressor of a <i>pkh1 pkh2</i> double mutant         | 0.6 | 0.82211<br>8 |
| ROM2 | GDP/GTP exchange protein (GEP) for <i>Rho1p</i> and <i>Rho2p</i> ; mutations are synthetically lethal with mutations in <i>rom1</i> , which also encodes a GEP                                                                                                        | 0.6 | 1            |
| GFA1 | Glutamine-fructose-6-phosphate amidotransferase, catalyzes the formation of glucosamine-6-P and glutamate from fructose-6-P and glutamine in the first step of chitin biosynthesis                                                                                    | 0.5 | 1            |
| MID2 | O-glycosylated plasma membrane protein that acts as a sensor for cell wall integrity signaling and activates the pathway; interacts with <i>Rom2p</i> , a guanine nucleotide exchange factor for <i>Rho1p</i> , and with cell integrity pathway protein <i>Zeo1p</i>  | 0.5 | 1            |
| PTP3 | Phosphotyrosine-specific protein phosphatase involved in the inactivation of mitogen-activated protein kinase (MAPK) during osmolarity sensing; dephosphorylates <i>Hog1p</i> MAPK and regulates its localization; localized to the cytoplasm                         | 0.4 | 1            |
| TUS1 | Guanine nucleotide exchange factor (GEF) that functions to modulate <i>Rho1p</i> activity as part of the cell integrity signaling pathway; multicopy suppressor of <i>tor2</i> mutation and <i>ypk1 ypk2</i> double mutation; potential <i>Cdc28p</i> substrate       | 0.4 | 1            |
| BCK1 | Mitogen-activated protein (MAP) kinase kinase kinase acting in the protein kinase C signaling pathway, which controls cell integrity; upon activation by <i>Pkc1p</i> phosphorylates downstream kinases <i>Mkk1p</i> and <i>Mkk2p</i>                                 | 0.3 | 1            |
| RHO5 | Non-essential small GTPase of the Rho/Rac subfamily of Ras-like proteins, likely involved in protein kinase C ( <i>Pkc1p</i> )-dependent signal transduction pathway that controls cell integrity                                                                     | 0.3 | 1            |



|      |                                                                                                                                                                                                                                                 |      |   |
|------|-------------------------------------------------------------------------------------------------------------------------------------------------------------------------------------------------------------------------------------------------|------|---|
| PKH1 | Serine/threonine protein kinase involved in sphingolipid-mediated signaling pathway that controls endocytosis; activates Ypk1p and Ykr2p, components of signaling cascade required for maintenance of cell wall integrity; redundant with Pkh2p | 0.3  | 1 |
| PKC1 | Protein serine/threonine kinase essential for cell wall remodeling during growth; localized to sites of polarized growth and the mother-daughter bud neck; homolog of the alpha, beta, and gamma isoforms of mammalian protein kinase C (PKC)   | 0.3  | 1 |
| BNI1 | Formin, nucleates the formation of linear actin filaments, involved in cell processes such as budding and mitotic spindle orientation which require the formation of polarized actin cables, functionally redundant with BNR1                   | 0.3  | 1 |
| SWI4 | DNA binding component of the SBF complex (Swi4p-Swi6p), a transcriptional activator that in concert with MBF (Mbp1-Swi6p) regulates late G1-specific transcription of targets including cyclins and genes required for DNA synthesis and repair | 0.2  | 1 |
| MKK1 | Mitogen-activated kinase kinase involved in protein kinase C signaling pathway that controls cell integrity; upon activation by Bck1p phosphorylates downstream target, Slt2p; functionally redundant with Mkk2p                                | 0.2  | 1 |
| MSG5 | Dual-specificity protein phosphatase required for maintenance of a low level of signaling through the cell integrity pathway; regulates and is regulated by Slt2p; dephosphorylates Fus3p; required for adaptive response to pheromone          | 0.1  | 1 |
| SEC3 | Non-essential subunit of the exocyst complex (Sec3p, Sec5p, Sec6p, Sec8p, Sec10p, Sec15p, Exo70p, Exo84p) which mediates targeting of post-Golgi vesicles to sites of active exocytosis; Sec3p specifically is a spatial landmark for secretion | 0.1  | 1 |
| FKS3 | Protein involved in spore wall assembly, has similarity to 1,3-beta-D-glucan synthase catalytic subunits Fks1p and Gsc2p; the authentic, non-tagged protein is detected in highly purified mitochondria in high-throughput studie               | 0.0  | 1 |
| SAC7 | GTPase activating protein (GAP) for Rho1p, involved in signaling to the actin cytoskeleton, null mutations suppress tor2 mutations and temperature sensitive mutations in actin; potential Cdc28p substrate                                     | -0.1 | 1 |
| BNR1 | Formin, nucleates the formation of linear actin filaments, involved in cell processes such as budding and mitotic spindle orientation which require the formation of polarized actin cables, functionally redundant with BNI1                   | -0.2 | 1 |
| BEM2 | Rho GTPase activating protein (RhoGAP) involved in the control of cytoskeleton organization and cellular morphogenesis; required for bud emergence                                                                                              | -0.2 | 1 |
| SKN7 | Nuclear response regulator and transcription factor, part of a branched two-component signaling system; required                                                                                                                                | -0.3 | 1 |

|                          |                                                                                                                                                                                                                                                  |      |              |
|--------------------------|--------------------------------------------------------------------------------------------------------------------------------------------------------------------------------------------------------------------------------------------------|------|--------------|
|                          | for optimal induction of heat-shock genes in response to oxidative stress; involved in osmoregulation                                                                                                                                            |      |              |
| RHO1                     | GTP-binding protein of the rho subfamily of Ras-like proteins, involved in establishment of cell polarity; regulates protein kinase C (Pkc1p) and the cell wall synthesizing enzyme 1,3-beta-glucan synthase (Fks1p and Gsc2p)                   | -0.3 | 1            |
| SWI6                     | Transcription cofactor, forms complexes with DNA-binding proteins Swi4p and Mbp1p to regulate transcription at the G1/S transition; involved in meiotic gene expression; localization regulated by phosphorylation; potential Cdc28p substrate   | -0.5 | 0.68630<br>7 |
| FKS1                     | Catalytic subunit of 1,3-beta-D-glucan synthase, functionally redundant with alternate catalytic subunit Gsc2p; binds to regulatory subunit Rho1p; involved in cell wall synthesis and maintenance; localizes to sites of cell wall remodeling   | -0.6 | 1            |
| LRG1                     | Putative GTPase-activating protein (GAP) involved in the Pkc1p-mediated signaling pathway that controls cell wall integrity; appears to specifically regulate 1,3-beta-glucan synthesis                                                          | -0.8 | 0.18536<br>7 |
| WSC2                     | Partially redundant sensor-transducer of the stress-activated PKC1-MPK1 signaling pathway involved in maintenance of cell wall integrity and recovery from heat shock; secretory pathway Wsc2p is required for the arrest of secretion response, | -1.2 | 0.45421<br>4 |
| <b>Sulfur metabolism</b> |                                                                                                                                                                                                                                                  |      |              |
| JLP1                     | Fe(II)-dependent sulfonate/alpha-ketoglutarate dioxygenase, involved in sulfonate catabolism for use as a sulfur source, contains sequence that closely resembles a J domain (typified by the E. coli DnaJ protein), JLP1                        | 6.7  | 1.80E-<br>05 |
| AGP3                     | Low-affinity amino acid permease, may act to supply the cell with amino acids as nitrogen source in nitrogen-poor conditions; transcription is induced under conditions of sulfur limitation, AGP3                                               | 5.1  | 3.92E-<br>06 |
| PDC6                     | Minor isoform of pyruvate decarboxylase, decarboxylates pyruvate to acetaldehyde, involved in amino acid catabolism; transcription is glucose- and ethanol-dependent, and is strongly induced during sulfur limitation, PDC6                     | 4.3  | 3.70E-<br>04 |
| BDS1                     | Bacterially-derived sulfatase required for use of alkyl- and aryl-sulfates as sulfur sources, BDS1                                                                                                                                               | 3.2  | 7.60E-<br>05 |
| GTO1                     | Omega-class glutathione transferase; induced under oxidative stress; putative peroxisomal localization, GTO1                                                                                                                                     | 2.2  | 9.17E-<br>05 |
| MHT1                     | S-methylmethionine-homocysteine methyltransferase, functions along with Sam4p in the conversion of S-adenosylmethionine (AdoMet) to methionine to control the methionine/AdoMet ratio, MHT1                                                      | 2.0  | 8.18E-<br>04 |
| MET8                     | Bifunctional dehydrogenase and ferrochelataase, involved                                                                                                                                                                                         | 1.9  | 4.47E-       |

|         |                                                                                                                                                                                                                                                       |     |          |
|---------|-------------------------------------------------------------------------------------------------------------------------------------------------------------------------------------------------------------------------------------------------------|-----|----------|
|         | in the biosynthesis of siroheme, a prosthetic group used by sulfite reductase; required for sulfate assimilation and methionine biosynthesis, MET8                                                                                                    |     | 04       |
| YLL058W | Putative protein of unknown function with similarity to Str2p, which is a cystathionine gamma-synthase important in sulfur metabolism; YLL058W is not an essential gene, ---                                                                          | 1.8 | 3.34E-03 |
| MET32   | Zinc-finger DNA-binding protein, involved in transcriptional regulation of the methionine biosynthetic genes, similar to Met31p, MET32                                                                                                                | 1.6 | 4.12E-04 |
| THI4    | Thiazole synthase, catalyzes formation of the thiazole moiety of thiamin pyrophosphate; required for thiamine biosynthesis and for mitochondrial genome stability, THI4                                                                               | 1.6 | 1.27E-04 |
| MET28   | Transcriptional activator in the Cbf1p-Met4p-Met28p complex, participates in the regulation of sulfur metabolism, MET28                                                                                                                               | 1.6 | 1.74E-04 |
| MET30   | F-box protein containing five copies of the WD40 motif, controls cell cycle function, sulfur metabolism, and methionine biosynthesis as part of the ubiquitin ligase complex; interacts with and regulates Met4p, localizes within the nucleus, MET30 | 1.6 | 2.18E-03 |
| MET2    | L-homoserine-O-acetyltransferase, catalyzes the conversion of homoserine to O-acetyl homoserine which is the first step of the methionine biosynthetic pathway, MET2                                                                                  | 1.5 | 1.79E-04 |
| ECM4    | Omega class glutathione transferase; not essential; similar to Ygr154cp; green fluorescent protein (GFP)-fusion protein localizes to the cytoplasm, ECM4                                                                                              | 1.4 | 2.94E-04 |
| GSH1    | Gamma glutamylcysteine synthetase catalyzes the first step in glutathione (GSH) biosynthesis; expression induced by oxidants, cadmium, and mercury, GSH1                                                                                              | 1.3 | 5.85E-04 |
| GTT2    | Glutathione S-transferase capable of homodimerization; functional overlap with Gtt2p, Grx1p, and Grx2p, GTT2                                                                                                                                          | 1.2 | 1.15E-03 |
| YHR112C | Putative protein of unknown function; green fluorescent protein (GFP)-fusion protein localizes to the cytoplasm, --                                                                                                                                   | 1.2 | 1.65E-03 |
| MET3    | ATP sulfurylase, catalyzes the primary step of intracellular sulfate activation, essential for assimilatory reduction of sulfate to sulfide, involved in methionine metabolism, MET3                                                                  | 1.1 | 9.38E-03 |
| GTT1    | ER associated glutathione S-transferase capable of homodimerization; expression induced during the diauxic shift and throughout stationary phase; functional overlap with Gtt2p, Grx1p, and Grx2p, GTT1                                               | 1.0 | 9.16E-03 |
| SAM2    | S-adenosylmethionine synthetase, catalyzes transfer of the adenosyl group of ATP to the sulfur atom of methionine; one of two differentially regulated isozymes (Sam1p and Sam2p), SAM2                                                               | 0.9 | 8.18E-03 |

| <b>Iron ion homeostasis</b> |                                                                                                                                                                                                                                            |     |          |
|-----------------------------|--------------------------------------------------------------------------------------------------------------------------------------------------------------------------------------------------------------------------------------------|-----|----------|
| HMX1                        | ER localized, heme-binding peroxidase involved in the degradation of heme; does not exhibit heme oxygenase activity despite similarity to heme oxygenases; expression regulated by AFT1, HMX1                                              | 2.5 | 9.76E-03 |
| SIT1                        | Ferrioxamine B transporter, member of the ARN family of transporters that specifically recognize siderophore-iron chelates; transcription is induced during iron deprivation and diauxic shift; potentially phosphorylated by Cdc28p, SIT1 | 2.3 | 1.28E-03 |
| FIT2                        | Mannoprotein that is incorporated into the cell wall via a glycosylphosphatidylinositol (GPI) anchor, involved in the retention of siderophore-iron in the cell wall, FIT2                                                                 | 2.0 | 6.39E-05 |
| ARN2                        | Transporter, member of the ARN family of transporters that specifically recognize siderophore-iron chelates; responsible for uptake of iron bound to the siderophore triacetylfusarinine C, ARN2                                           | 1.9 | 1.38E-03 |
| FIT3                        | Mannoprotein that is incorporated into the cell wall via a glycosylphosphatidylinositol (GPI) anchor, involved in the retention of siderophore-iron in the cell wall, FIT3                                                                 | 1.7 | 5.54E-03 |
| TIS11                       | mRNA-binding protein expressed during iron starvation; binds to a sequence element in the 3'-untranslated regions of specific mRNAs to mediate their degradation; involved in iron homeostasis, TIS11                                      | 1.4 | 3.07E-03 |
| PCA1                        | Cadmium transporting P-type ATPase; may also have a role in copper and iron homeostasis; S288C and most other lab strains contain a G970R mutation which eliminates normal cadmium transport function, PCA1                                | 1.2 | 7.40E-03 |
| FRE6                        | Putative ferric reductase with similarity to Fre2p; expression induced by low iron levels, FRE6                                                                                                                                            | 1.1 | 7.08E-03 |
| ATX1                        | Cytosolic copper metallochaperone that transports copper to the secretory vesicle copper transporter Ccc2p for eventual insertion into Fet3p, which is a multicopper oxidase required for high-affinity iron uptake, ATX1                  | 1.1 | 9.51E-03 |

<sup>a</sup> The log<sub>2</sub> ratio of treated/control.

<sup>b</sup> The Bonferroni-corrected p values.

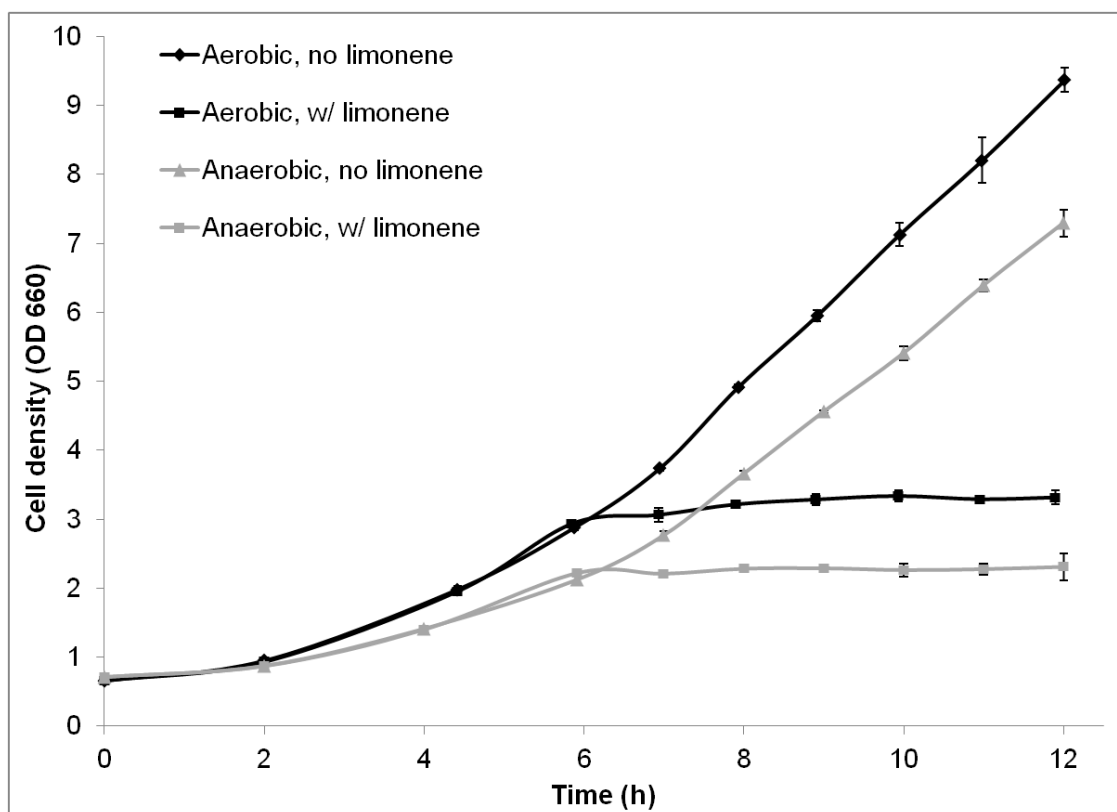

**SI Fig 2.** Anaerobic vs. aerobic growth curves. 107 mg/L of limonene was added at mid-exponential phase. Error bars represent one SD above and below the mean for biological triplicates.

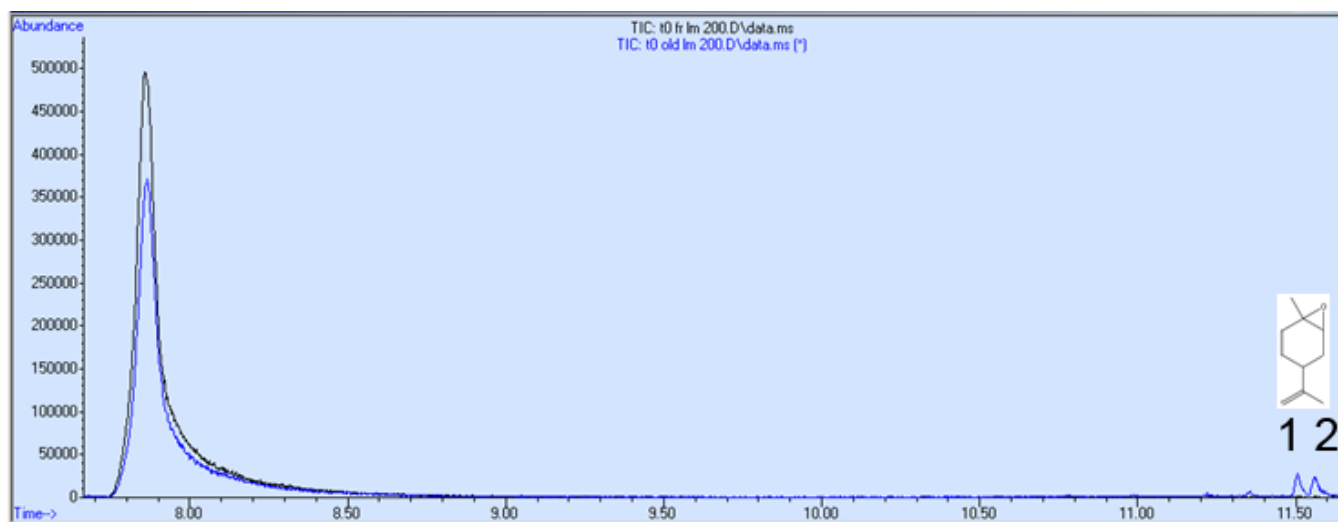

**SI Fig 3.** GC-MS chromatogram of limonene (RT = 7.9 min) sampled from challenged cultures after 6 h incubation at 30°C. The black line is limonene from anaerobic flasks (with no limonene oxide formation) and the blue line represents limonene from aerobic cultures (limonene oxide compounds at 11.5 min, peak 1 = limonene oxide, cis and peak 2 = limonene oxide, trans.). At 12 after inoculation (6 h after limonene addition), 1 mL of isopropyl

myristate (IPM) was added to the culture (~ 22 ml), vortexed and harvested (1 min, 4025 rcf). The top IPM phase containing limonene was removed and 1  $\mu$ L was resuspended in 1 mL of a 1:4 toluene:hexane solution. The GC-MS analysis was carried out using the setting described in the Materials and Methods section with the following changes: 1  $\mu$ L of sample was injected and the oven temperature was set to 70°C, held for 10 min then followed by a temperature ramp of 40 °C/min to 300°C and held for 3 min. Detection was achieved in scan mode at 9.26 scans/sec from 30-300 amu.

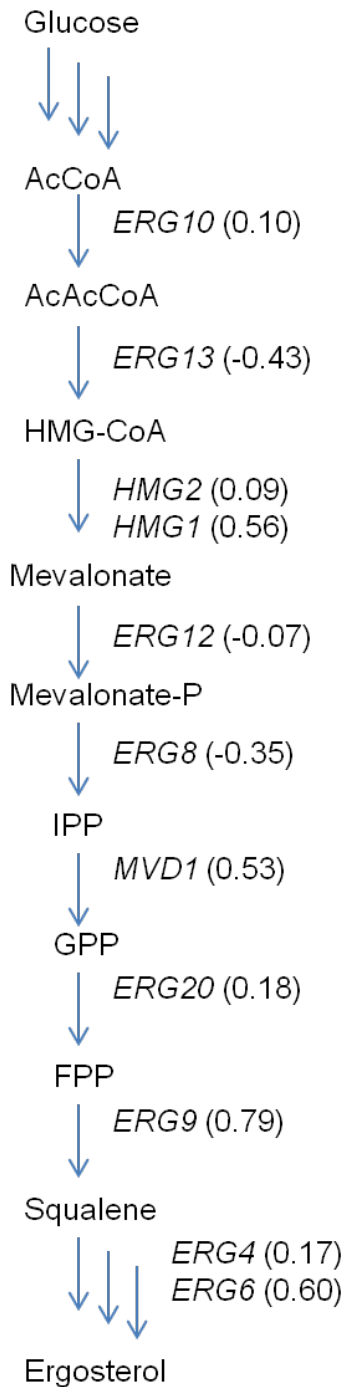

**SI Fig 4.** Transcript levels of genes associated with ergosterol biosynthesis. Numbers in the parenthesis represent the  $\log_2$  fold changes of that particular gene (treated/control). None of these genes were differentially expressed (Bonferroni-corrected  $p < 0.01$ ).

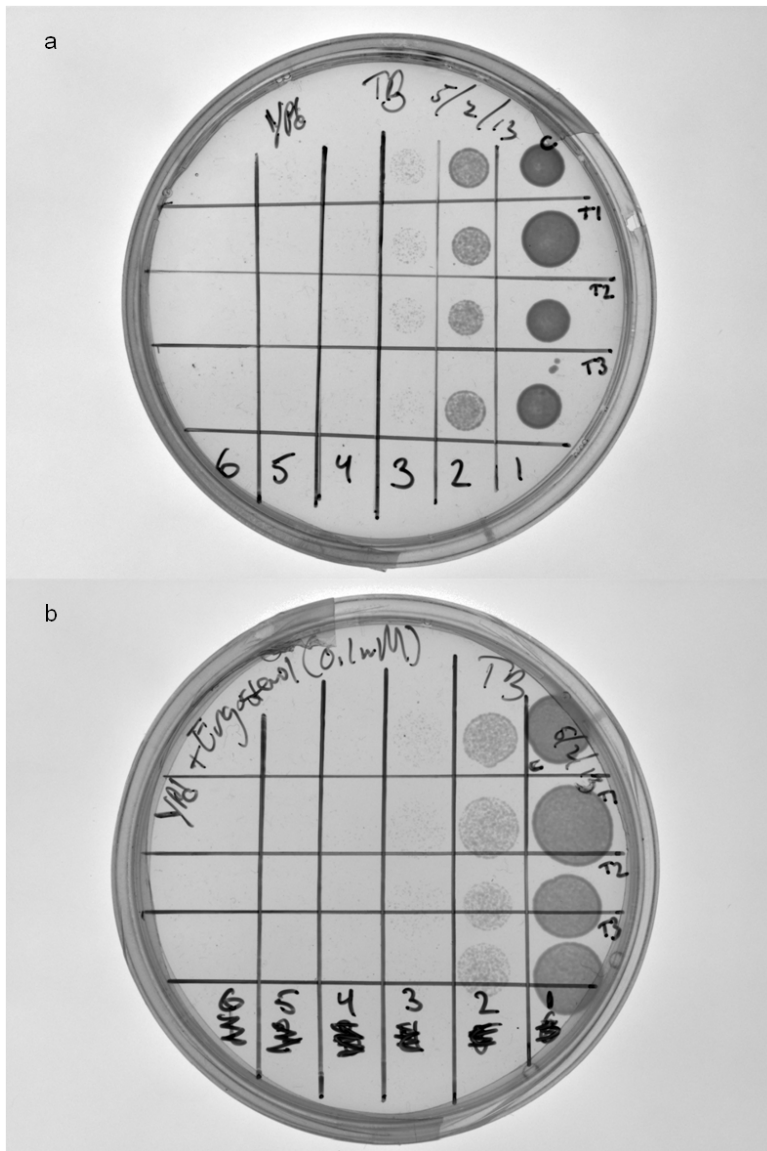

**SI Fig 5.** Effect of exogenous ergosterol on the growth and viability. Yeast cultures were dosed with limonene as described in the Materials and Methods. Cells were harvested and washed and diluted on rich medium (YPD) plates as described by Liu, et al (1). (a) YPD and (b) YPD + 0.1 mM ergosterol/Tween 80 (0.25% v/v). The top row of each plate is the untreated control and rows 2-4 represent biological replicates for limonene-treated cells at varying dilutions ( $10^{-1}$ - $10^{-6}$ ). Image was taken at 24 h. Tween 80 did cause spreading of the culture droplet on the surface in the ergosterol supplemented plate causing an increase in the diameter.

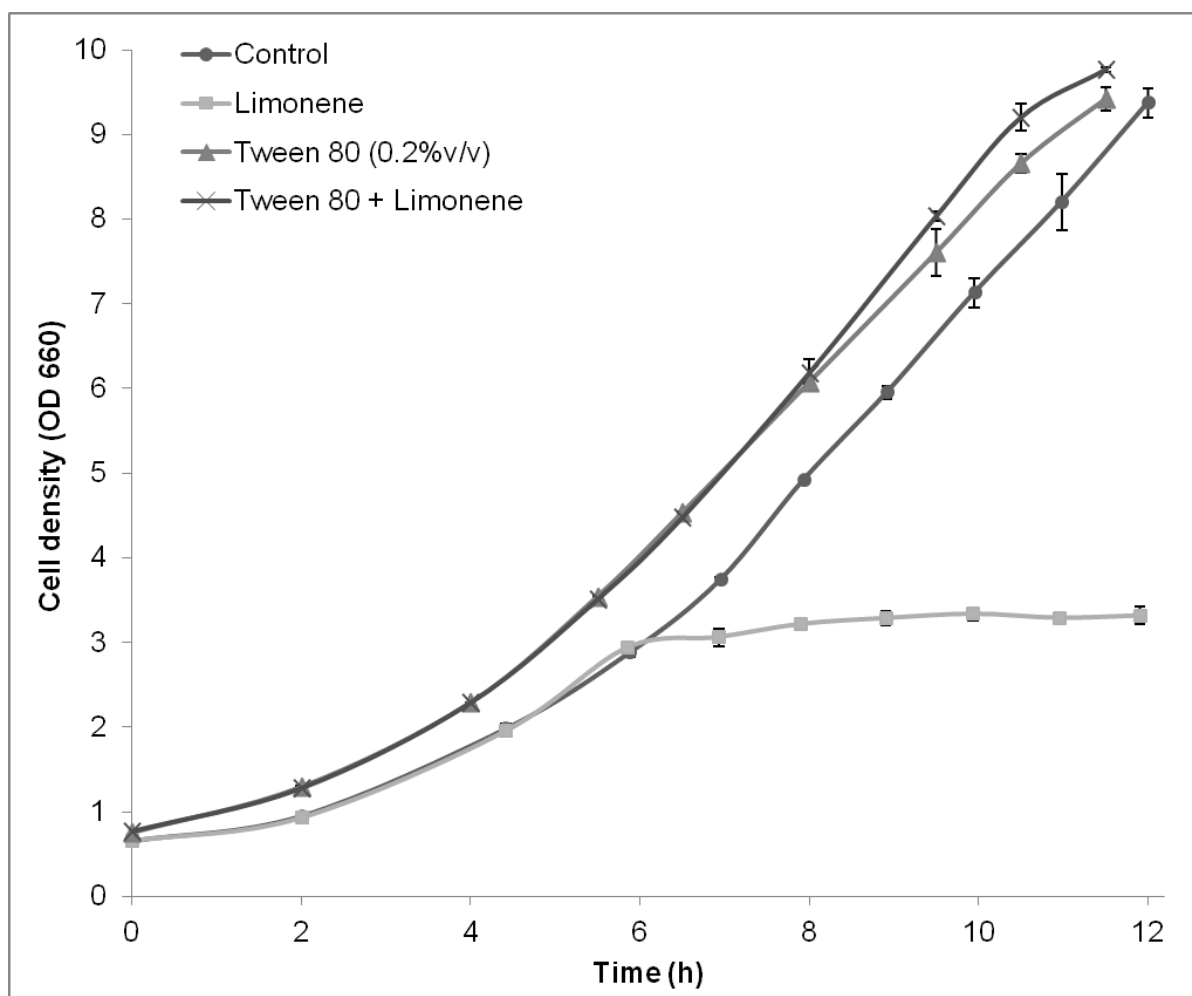

**SI Fig 6.** Dose response growth curves in the presence of limonene and limonene + surfactant. 107 mg/L of limonene was added at mid-exponential phase. Limonene was administered in the presence and absence of Tween 80 (0.2% v/v). Error bars represent one SD above and below the mean for biological triplicates.

#### References:

1. **Liu, J., Y. Zhu, G. Du, J. Zhou, and J. Chen.** 2013. Exogenous ergosterol protects *Saccharomyces cerevisiae* from d-limonene stress. *J. Appl. Microbiol.* **114**:482-491.
